# Supplementary material for: Clinical Impact of Ultra-Fast Whole Genome Sequencing in Paediatric Haematology-Oncology Practice
Source: Research Square preprint supplement (doi:10.21203/rs.3.rs-7751862/v1), 2025-10-17
Supplement: Supplementary file 2 [file af470a2f6ed5b469bc3acda2.xlsx]

## Sheet: Supp Table 4
PID	Diagnosis.group	Diagnosis.Subgroup	Diagnosis	Timepoint	Collection	Clinical change category	Molecular information guiding treatment	Clinical vignette
32	Solid	Sarcoma	Rhabdomyosarcoma	Diagnosis	Retrospective	Precision medicine	Diagnosis	RMS signature, no DICER1
59	Solid	Renal	Renal Cell Carcinoma	Relapse	Prospective	Precision medicine	Diagnosis	Mixed RCC and Wilms, same as diagnosis, treated with Wilms directed therapy
66	Haem	Lymphoma	T-lymphoblastic lymphoma	Diagnosis	Prospective	Precision medicine	Diagnosis	Diagnosis yielded from pleural fluid, no biopsy required, clinically unsafe
68	Haem	Leukaemia	Transient leukaemia Down Syndrome	Diagnosis	Prospective	Precision medicine	Diagnosis	Confirmed GATA1 variant, consistent with TAM, likely germline T21 consistent with clinical features
21	Solid	Renal	Wilms Tumour	Diagnosis	Prospective	Precision medicine	Germline	No germline WT predisposition, nephrectomy post adjuvant chemo
26	Solid	CNS	Pineoblastoma	Diagnosis	Prospective	Precision medicine	Germline	Germline DICER1 variant, implications for radiotherapy dose, cascade testing for first degree relatives with family history of malignancy
27	Solid	Carcinoma	Nasopharyngeal carcinoma	Diagnosis	Prospective	Precision medicine	Germline	Pharmacogenomic analysis of DPYD to treat with 5FU
29	Solid	Carcinoma	Colorectal carcinoma	Diagnosis	Prospective	Precision medicine	Germline	CMMRD diagnosis
9	Haem	Leukaemia	AML	Diagnosis	Prospective	Precision medicine	Risk stratification	KMT2A rearrangement, high risk
13	Haem	Leukaemia	MPAL	Relapse	Prospective	Precision medicine	Risk stratification	KMT2A rearrangement, high risk
69	Solid	CNS	Ependymoma	Diagnosis	Retrospective	Precision medicine	Germline	PMS2 detected with proximity mapping, CMMRD confirmed, avoid ionising radiation
24	Solid	Thyroid	Papillary Thyroid Carcinoma	Diagnosis	Prospective	Precision medicine	Targeted treatment	BRAF V600E, PIK3CA targeted treatment available
28	Solid	CNS	Pilocytic Astrocytoma	Diagnosis	Prospective	Precision medicine	Targeted treatment	Targeted treatment available on trial
38	Solid	Soft tissue	Aneurysmal bone cyst	Diagnosis	Retrospective	Precision medicine	Risk stratification	USP6 fusion, bone cyst, avoided mutilating surgery, curettage only
40	Solid	CNS	PLAGL2-amplified embryonal tumour	Diagnosis	Retrospective	Precision medicine	Risk stratification	PLAGL-2 tumour - more aggressive, would have received Headstart rather than EuRhab chemo
46	Solid	CNS	High grade embryonal brain tumour	Diagnosis	Retrospective	Precision medicine	Risk stratification	ATXN1::NUTM2D novel fusion, aggressive, offer palliation at diagnosis
52	Solid	Pancreas	Pancreatic acinic cell carcinoma	Diagnosis	Prospective	Precision medicine	Targeted treatment	BRAF fusion, eligible for MEKi as no curable treatment available
60	Haem	Leukaemia	Philadelphia +ve ALL	Diagnosis	Prospective	Precision medicine	Targeted treatment	BCR::ABL fusion, treated with TKI from diagnosis
36	Solid	LCH	LCH	Diagnosis	Retrospective	Precision medicine	Targeted treatment	Novel KLC1-RAF1 fusion, targetable with MEKii
37	Haem	Lymphoma	Anaplastic Large Cell Lymphoma	Diagnosis	Retrospective	Precision medicine	Targeted treatment	NPM1::ALK fusion confirms ALCL diagnosis, clinical trials with targeted treatment available
51	Solid	CNS	Pleomorphic Xanthoastrocytoma	Diagnosis	Retrospective	Precision medicine	Targeted treatment	BRAF V600E, targeted treatment available
14	Haem	Leukaemia	MPAL	Remission	Prospective	Precision medicine	Germline	Standard BMT conditioning, no BMF
16	Haem	Leukaemia	T-Cell ALL	Remission	Prospective	Treatment de-escalation	Treatment de-escalation	No germline WT predisposition, treated as leukaemia, no biopsy of renal mass
8	Haem	Leukaemia	Pre B ALL	Diagnosis	Prospective	Treatment de-escalation	Treatment de-escalation	IGH-Dux4 rearrangement
22	Solid	Soft tissue	Fat necrosis	Diagnosis	Prospective	Treatment de-escalation	Avoidance of harmful treatment	Non-malignant diagnosis, observation only
33	Solid	Soft tissue	Infantile Fibromyoma	Diagnosis	Retrospective	Treatment de-escalation	Avoidance of harmful treatment	PDGFRB mutation, observation only
49	Solid	Soft tissue	FOP	Diagnosis	Prospective	Treatment de-escalation	Avoidance of harmful treatment	ACVR1 germline mutation, no further surgery, no chemo, targeted treatment

## Sheet: Supp Table 5
PID	Variant ID	Gene	GRCh38 coordinates	Ref/Alt	Variant	NHS VAF/Zygosity	UF VAF/Zygosity	Cytological band	Variant type	Variant sub-type	Predicted consequence	Origin	NHS SOC	NHS WGS	UF WGS	NHS vs UF difference type	NHS vs UF difference reason	NHS vs UF comments	Gender	Age	Diagnosis.group	Diagnosis.Subgroup	Diagnosis	Timepoint	Collection	Sample.1	Sample.2	Sample Type for UF-WGS	Comparison	Clinical.change.in.management	Comments
1	2	NRAS	1:114713908	T>A	c.182A>T;p.Gln61Leu	0.07	NA	NA	SNV/indel	Missense	Activating	Somatic	NA	Yes	No	Biological	Low VAF	1 supporting read in sequencing data	Male	3.78	Haem	B ALL	Pre B ALL	Diagnosis	Prospective	PB	BM	PB/BM crude lysate	Tumour only	N
1	1	KRAS	12:25245347	C>T	c.38G>A;p.Gly13Asp	0.19	0.35	NA	SNV/indel	Missense	Activating	Somatic	NA	Yes	Yes	NA	NA	NA	Male	3.78	Haem	B ALL	Pre B ALL	Diagnosis	Prospective	PB	BM	PB/BM crude lysate	Tumour only	N
1	3	PAX5	9:36929050;9:37030698	NA	Deletion (exon 2-6)	NA	NA	9p13.2	SV	Deletion	Loss of function	Somatic	Yes	Yes	Yes	NA	NA	NA	Male	3.78	Haem	B ALL	Pre B ALL	Diagnosis	Prospective	PB	BM	PB/BM crude lysate	Tumour only	N
1	4	NA	NA	NA	NA	NA	NA	chr4, 5, 6, 8, 10, 11, 14, 16, 17, 18, 21, X	Cyto	Gain	Hyperdiploid	Somatic	Yes	Yes	Yes	NA	NA	NA	Male	3.78	Haem	B ALL	Pre B ALL	Diagnosis	Prospective	PB	BM	PB/BM crude lysate	Tumour only	N
2	5	NA	NA	NA	NA	NA	NA	chr3, 4, 5, 6, 8, 9, 10, 11, 14, 16, 18, 21, X, 1q, 12q 17q	Cyto	Gain	Hyperdiploid	Somatic	Yes	Yes	Yes	NA	NA	NA	Male	4.24	Haem	B ALL	Pre B ALL	Diagnosis	Prospective	PB	BM	PB/BM crude lysate	Tumour only	N
2	6	IKZF1	7:50135211-50417992	NA	LOSS(1)	NA	NA	7p12.2	CNV	Loss	Heterozygous loss	Somatic	No	No	Yes	Technical	Pipeline problem	Illumina to investigate - 'heterogeneous' flag in Constellation	Male	4.24	Haem	B ALL	Pre B ALL	Diagnosis	Prospective	PB	BM	PB/BM crude lysate	Tumour only	N
3	7	ETV6	12:11885966	TGC>CGGAG	c.1193_1195delinsCGGAG;p.Leu398ProfsTer8	0.06	NA	NA	SNV/indel	Frameshift	Loss of function	Somatic	NA	Yes	No	Biological	Low VAF	1 supporting read in sequencing data	Male	9.44	Haem	B ALL	Pre B ALL	Diagnosis	Prospective	PB	BM	PB/BM crude lysate	Tumour only	N
3	8	KRAS	12:25245347	C>T	c.38G>A;p.Gly13Asp	0.25	0.42	NA	SNV/indel	Missense	Activating	Somatic	NA	Yes	Yes	NA	NA	NA	Male	9.44	Haem	B ALL	Pre B ALL	Diagnosis	Prospective	PB	BM	PB/BM crude lysate	Tumour only	N
3	9	ETV6	12:11883861;12:11983404	NA	Deletion (exon 6-8)	NA	NA	12p13.2	SV	Deletion	Loss of function	Somatic	Yes	Yes	Yes	NA	NA	NA	Male	9.44	Haem	B ALL	Pre B ALL	Diagnosis	Prospective	PB	BM	PB/BM crude lysate	Tumour only	N
3	10	NA	NA	NA	NA	NA	NA	chr4, 6, 10, 14, 18, 21, X, 1q, 17q	Cyto	Gain	Hyperdiploid	Somatic	Yes	Yes	Yes	NA	NA	NA	Male	9.44	Haem	B ALL	Pre B ALL	Diagnosis	Prospective	PB	BM	PB/BM crude lysate	Tumour only	N
4	11	ETV6::RUNX1	12:11881692;21:35048360	NA	ETV6::RUNX1	NA	NA	12p13.2;21q22.12	SV	Translocation	Gene fusion	Somatic	Yes	Yes	Yes	NA	NA	NA	Male	5.16	Haem	B ALL	Pre B ALL	Diagnosis	Prospective	PB	BM	PB/BM crude lysate	Tumour only	N
4	12	ETV6	12:11572614-13383038	NA	LOSS(1)	NA	NA	12p13.2-p13.1	CNV	Loss	Heterozygous loss	Somatic	Yes	Yes	Yes	NA	NA	NA	Male	5.16	Haem	B ALL	Pre B ALL	Diagnosis	Prospective	PB	BM	PB/BM crude lysate	Tumour only	N
5	13	CALR	19:12943750-12943802	NA	p.Glu364_Glu381del	NA	NA	19p13.13	SV	Deletion	Activating	Somatic	Yes	Yes	Yes	NA	NA	NA	Female	14.66	Haem	MDS	Essential thrombocythaemia	Diagnosis	Prospective	PB	BM	PB/BM crude lysate	Tumour only	N
6	14	RUNX1::RUNX1T1	8:92063432;21:34825978	NA	RUNX1::RUNX1T1	NA	NA	8q21.3;21q22.12	SV	Translocation	Gene fusion	Somatic	Yes	Yes	Yes	NA	NA	NA	Male	12.59	Haem	AML	AML	Diagnosis	Prospective	PB	BM	PB/BM crude lysate	Tumour only	N
7	15	ETV6	12:11869053;12:11873507	NA	Deletion (exon 5)	NA	NA	12p13.2	SV	Deletion	Loss of function	Somatic	Yes	Yes	Yes	NA	NA	NA	Female	11.92	Haem	B ALL	Pre B ALL	Diagnosis	Prospective	PB	BM	PB/BM crude lysate	Tumour only	N
7	16	IKZF1	7:50400294;7:50420547	NA	Deletion (exon 8)	NA	NA	7p12.2	SV	Deletion	Loss of function	Somatic	Yes	Yes	Yes	NA	NA	NA	Female	11.92	Haem	B ALL	Pre B ALL	Diagnosis	Prospective	PB	BM	PB/BM crude lysate	Tumour only	N
7	18	NA	NA	NA	NA	NA	NA	chr4, 6, 10, 14, 17, 18, 21, X, 5p-5q22.3	Cyto	Gain	Hyperdiploid	Somatic	Yes	Yes	Yes	NA	NA	NA	Female	11.92	Haem	B ALL	Pre B ALL	Diagnosis	Prospective	PB	BM	PB/BM crude lysate	Tumour only	N
7	17	CBL	11:119278142;11:119279123	NA	Deletion (exon 8-9)	NA	NA	11q23.3	SV	Deletion	Loss of function	Somatic	Yes	Yes	No	Technical	Pipeline problem	Pipeline error, solved in new UF pipeline.	Female	11.92	Haem	B ALL	Pre B ALL	Diagnosis	Prospective	PB	BM	PB/BM crude lysate	Tumour only	N
8	19	NRAS	1:114716123	C>T	c.38G>A;p.Gly13Asp	0.18	0.19	NA	SNV/indel	Missense	Activating	Somatic	NA	Yes	Yes	NA	NA	NA	Female	5.52	Haem	B ALL	Pre B ALL	Diagnosis	Prospective	PB	BM	PB/BM crude lysate	Tumour only	Y	IGH-Dux4 rearrangement
8	20	NRAS	1:114716124	C>G	c.37G>C;p.Gly13Arg	0.05	0.06	NA	SNV/indel	Missense	Activating	Somatic	NA	Yes	Yes	NA	NA	NA	Female	5.52	Haem	B ALL	Pre B ALL	Diagnosis	Prospective	PB	BM	PB/BM crude lysate	Tumour only	Y	IGH-Dux4 rearrangement
8	21	NRAS	1:114716126	C>T	c.35G>A;p.Gly12Asp	0.06	NA	NA	SNV/indel	Missense	Activating	Somatic	NA	Yes	No	Technical	Pipeline problem	Multiallelic calling. Pipeline error, solved in new UF pipeline.	Female	5.52	Haem	B ALL	Pre B ALL	Diagnosis	Prospective	PB	BM	PB/BM crude lysate	Tumour only	Y	IGH-Dux4 rearrangement
8	22	IGH::DUX4	NA	NA	IGH::DUX4	NA	NA	NA	SV	Translocation	Activating rearrangement	Somatic	No	No	Yes	Technical	Pipeline problem	GMS pipeline unable to detect at this time, new pipeline able to detect	Female	5.52	Haem	B ALL	Pre B ALL	Diagnosis	Prospective	PB	BM	PB/BM crude lysate	Tumour only	Y	IGH-Dux4 rearrangement
9	23	NRAS	1:114713909	G>T	c.181C>A;p.Gln61Lys	0.43	0.49	NA	SNV/indel	Missense	Activating	Somatic	Yes	Yes	Yes	NA	NA	NA	Male	1.66	Haem	AML	AML	Diagnosis	Prospective	PB	BM	PB/BM crude lysate	Tumour only	Y	KMT2A rearrangement, high risk
9	24	MLLT10::KMT2A	10:21559550;11:118484524	NA	MLLT10::KMT2A	NA	NA	10p12.31;11q23.3	SV	Translocation	Gene fusion	Somatic	Yes	Yes	Yes	NA	NA	NA	Male	1.66	Haem	AML	AML	Diagnosis	Prospective	PB	BM	PB/BM crude lysate	Tumour only	Y	KMT2A rearrangement, high risk
10	25	NRAS	1:114716123	C>T	c.38G>A;p.(Gly13Asp)	NA	0.05	NA	SNV/indel	Missense	Activating	Somatic	NA	No	Yes	Biological	Low VAF	1 supporting read in CRAM	Female	14.56	Haem	B ALL	Pre B ALL	Diagnosis	Prospective	PB	BM	PB/BM crude lysate	Tumour only	N
10	26	CDKN2A	9:21354287-22867799	NA	LOSS(0)	NA	NA	9p21.3;9p21.3	CNV	Loss	Heterozygous loss	Somatic	Yes	Yes	Yes	NA	NA	NA	Female	14.56	Haem	B ALL	Pre B ALL	Diagnosis	Prospective	PB	BM	PB/BM crude lysate	Tumour only	N
10	27	CDKN2B	9:21354287-22867799	NA	LOSS(0)	NA	NA	9p21.3;9p21.3	CNV	Loss	Heterozygous loss	Somatic	Yes	Yes	Yes	NA	NA	NA	Female	14.56	Haem	B ALL	Pre B ALL	Diagnosis	Prospective	PB	BM	PB/BM crude lysate	Tumour only	N
10	28	RB1	13:29356243-114351266	NA	LOSS(1)	NA	NA	13q12.3;13q34	CNV	Loss	Homozygous loss	Somatic	Yes	Yes	Yes	NA	NA	NA	Female	14.56	Haem	B ALL	Pre B ALL	Diagnosis	Prospective	PB	BM	PB/BM crude lysate	Tumour only	N
10	29	NA	NA	NA	NA	NA	NA	chr4, 6, 10, 14, 21, X, 18p11.31-q23	Cyto	Gain	Hyperdiploid	Somatic	Yes	Yes	Yes	NA	NA	NA	Female	14.56	Haem	B ALL	Pre B ALL	Diagnosis	Prospective	PB	BM	PB/BM crude lysate	Tumour only	N
11	33	BTG1	12:91755802-92144289	NA	Deletion	NA	NA	12q21.33	SV	Deletion	Loss of function	Somatic	No	No	Yes	Biological	Low VAF	NA	Male	4.31	Haem	B ALL	Pre B ALL	Diagnosis	Prospective	PB	BM	PB/BM crude lysate	Tumour only	N
11	34	PAX5	9:36929051-37030701	NA	Deletion	NA	NA	9p13.2	SV	Deletion	Loss of function	Somatic	No	No	Yes	Biological	Low VAF	NA	Male	4.31	Haem	B ALL	Pre B ALL	Diagnosis	Prospective	PB	BM	PB/BM crude lysate	Tumour only	N
11	30	ETV6::RUNX1	12:11874753;21:34906554	NA	ETV6::RUNX1	NA	NA	12p13.2;21q22.12	SV	Translocation	Gene fusion	Somatic	Yes	Yes	Yes	NA	NA	NA	Male	4.31	Haem	B ALL	Pre B ALL	Diagnosis	Prospective	PB	BM	PB/BM crude lysate	Tumour only	N
11	31	ETV6	12:11650602-11813066	NA	Deletion	NA	NA	12p13.2	SV	Deletion	Loss of function	Somatic	Yes	Yes	Yes	NA	NA	NA	Male	4.31	Haem	B ALL	Pre B ALL	Diagnosis	Prospective	PB	BM	PB/BM crude lysate	Tumour only	N
11	32	EBF1	5:158516379-159101064	NA	LOSS(1)	NA	NA	5q33.3	CNV	Loss	Loss of function	Somatic	Yes	Yes	Yes	NA	NA	NA	Male	4.31	Haem	B ALL	Pre B ALL	Diagnosis	Prospective	PB	BM	PB/BM crude lysate	Tumour only	N
13	37	BCORL1	X:130025236	G>A	c.3935G>A;p.(Trp1312Ter)	0.05	NA	NA	SNV/indel	Nonsense	Loss of function	Somatic	Yes	NA	No	Biological	Low VAF	Compared UF to SOC, no NHS WGS, post HSCT sample	Male	3.8	Haem	MPAL	MPAL	Relapse	Prospective	BM	PB	BM crude lysate	Tumour only	Y	KMT2A rearrangement, high risk
13	35	KMT2A::MLLT10	11:118484599;10:21657184	NA	KMT2A::MLLT10	NA	NA	11q23.3;10p12.31	SV	Translocation	Gene fusion	Somatic	Yes	NA	Yes	NA	NA	Compared UF to SOC, no NHS WGS, post HSCT sample	Male	3.8	Haem	MPAL	MPAL	Relapse	Prospective	BM	PB	BM crude lysate	Tumour only	Y	KMT2A rearrangement, high risk
13	36	BCORL1	X:130015122	C>T	c.2350C>T;p.(Arg784Ter)	0.14	0.11	NA	SNV/indel	Nonsense	Loss of function	Somatic	Yes	NA	Yes	NA	NA	Compared UF to SOC, no NHS WGS, post HSCT sample	Male	3.8	Haem	MPAL	MPAL	Relapse	Prospective	BM	PB	BM crude lysate	Tumour only	Y	KMT2A rearrangement, high risk
14	38	NOTCH1	9:136504892	A>T	c.4799T>A;p.Leu1600Gln	0.06	NA	NA	SNV/indel	Missense	Activating	Somatic	Yes	Yes	NA	Remission sample	NA	Remission sample sent to identify any pertinent germline variants. No germline variants detected by either method.	Male	7.67	Haem	MPAL	MPAL	Remission	Prospective	BM	PB	BM crude lysate	Germline only	Y	Standard BMT conditioning, no BMF
14	39	NRAS	1:114716126	C>A	c.35G>T;p.Gly12Val	0.48	NA	NA	SNV/indel	Missense	Activating	Somatic	Yes	Yes	NA	Remission sample	NA	Remission sample sent to identify any pertinent germline variants. No germline variants detected by either method.	Male	7.67	Haem	MPAL	MPAL	Remission	Prospective	BM	PB	BM crude lysate	Germline only	Y	Standard BMT conditioning, no BMF
14	40	WT1	11:32399959	T>A	c.1087A>T;p.Arg363Ter	0.49	NA	NA	SNV/indel	Nonsense	Loss of function	Somatic	Yes	Yes	NA	Remission sample	NA	Remission sample sent to identify any pertinent germline variants. No germline variants detected by either method.	Male	7.67	Haem	MPAL	MPAL	Remission	Prospective	BM	PB	BM crude lysate	Germline only	Y	Standard BMT conditioning, no BMF
14	41	WT1	chr11:32396403	ACATCCTG>AGTAATTAATC	c.1063-3_1066delinsGATTAATTAC	0.51	NA	NA	SNV/indel	Splice site	Loss of function	Somatic	Yes	Yes	NA	Remission sample	NA	Remission sample sent to identify any pertinent germline variants. No germline variants detected by either method.	Male	7.67	Haem	MPAL	MPAL	Remission	Prospective	BM	PB	BM crude lysate	Germline only	Y	Standard BMT conditioning, no BMF
14	42	CDKN2A	9:21954008-22021390	NA	LOSS(1)	NA	NA	9p21.3	CNV	Loss	Loss of function	Somatic	Yes	Yes	NA	Remission sample	NA	Remission sample sent to identify any pertinent germline variants. No germline variants detected by either method.	Male	7.67	Haem	MPAL	MPAL	Remission	Prospective	BM	PB	BM crude lysate	Germline only	Y	Standard BMT conditioning, no BMF
14	43	CDKN2B	9:21954008-22021390	NA	LOSS(1)	NA	NA	9p21.3	CNV	Loss	Loss of function	Somatic	Yes	Yes	NA	Remission sample	NA	Remission sample sent to identify any pertinent germline variants. No germline variants detected by either method.	Male	7.67	Haem	MPAL	MPAL	Remission	Prospective	BM	PB	BM crude lysate	Germline only	Y	Standard BMT conditioning, no BMF
14	44	TLX3	5:171299378;14:98562226	NA	TLX3-rearrangement	NA	NA	5q35.1;14q32.2	SV	Translocation	Activating rearrangement	Somatic	Yes	Yes	NA	Remission sample	NA	Remission sample sent to identify any pertinent germline variants. No germline variants detected by either method.	Male	7.67	Haem	MPAL	MPAL	Remission	Prospective	BM	PB	BM crude lysate	Germline only	Y	Standard BMT conditioning, no BMF
15	45	PTEN	10:87952142	C>T	c.517C>T;p.Arg173Cys	0.08	NA	NA	SNV/indel	Missense	Loss of function	Somatic	Yes	Yes	No	Biological	Low VAF	3 supporting reads in UF sequencing files	Male	3.42	Haem	B ALL	Pre B ALL	Relapse	Prospective	BM	PB	BM crude lysate	Tumour only	N
15	51	CDKN2A	9:21169043-22560743	NA	LOSS(0)	NA	NA	9p21.3	CNV	Loss	Loss of function	Somatic	Yes	No	Yes	Data quality	Uneven coverage	Detected by SOC SNP Array but not WGS due to suboptimal data quality	Male	3.42	Haem	B ALL	Pre B ALL	Relapse	Prospective	BM	PB	BM crude lysate	Tumour only	N
15	52	CDKN2B	9:21169043-22560743	NA	LOSS(0)	NA	NA	9p21.3	CNV	Loss	Loss of function	Somatic	Yes	No	Yes	Data quality	Uneven coverage	Detected by SOC SNP Array but not WGS due to suboptimal data quality	Male	3.42	Haem	B ALL	Pre B ALL	Relapse	Prospective	BM	PB	BM crude lysate	Tumour only	N
15	46	ETV6::RUNX1	12:11876011;21:34913697	NA	ETV6::RUNX1	NA	NA	12p13.2;21q22.12	SV	Translocation	Gene fusion	Somatic	Yes	Yes	Yes	NA	NA	NA	Male	3.42	Haem	B ALL	Pre B ALL	Relapse	Prospective	BM	PB	BM crude lysate	Tumour only	N
15	47	ETV6	12:11877250;12:12026205	NA	Deletion	NA	NA	12p13.2	SV	Deletion	Loss of function	Somatic	Yes	Yes	Yes	NA	NA	NA	Male	3.42	Haem	B ALL	Pre B ALL	Relapse	Prospective	BM	PB	BM crude lysate	Tumour only	N
15	48	ETV6	12:9321696;12:11885517	NA	Deletion	NA	NA	12p13.31;12p13.2	SV	Deletion	Loss of function	Somatic	Yes	Yes	Yes	NA	NA	NA	Male	3.42	Haem	B ALL	Pre B ALL	Relapse	Prospective	BM	PB	BM crude lysate	Tumour only	N
15	49	IKZF1	7:50345195;7:50395934	NA	Deletion	NA	NA	7p12.2	SV	Deletion	Loss of function	Somatic	Yes	Yes	Yes	NA	NA	NA	Male	3.42	Haem	B ALL	Pre B ALL	Relapse	Prospective	BM	PB	BM crude lysate	Tumour only	N
15	50	P2RY8::CRLF2	X:1212765;X:1535840	NA	P2RY8::CRLF2	NA	NA	Xp22.33	SV	Deletion	Gene fusion	Somatic	Yes	Yes	Yes	NA	NA	NA	Male	3.42	Haem	B ALL	Pre B ALL	Relapse	Prospective	BM	PB	BM crude lysate	Tumour only	N
16	NA	NA	NA	NA	NA	NA	NA	NA	NA	NA	NA	NA	NA	NA	NA	Remission sample	NA	NA	Male	2.71	Haem	T ALL	T-Cell ALL	Remission	Prospective	BM	PB	BM crude lysate	Germline only	Y	No germline WT predisposition, treated as leukaemia, no biopsy of renal mass
17	53	NPM1	5:171392750	G>GCTTCTCAAA	c.393_394ins9;p.Glu131_Asp132insLeuLeuLys	0.4	0.18	NA	SNV/indel	In-frame insertion	Activating	Somatic	Yes	Yes	Yes	NA	NA	NA	Male	14.27	Haem	AML	AML	Diagnosis	Prospective	BM	NA	BM crude lysate	Tumour only	N
17	54	PHF6	X:134413494	A>ACC	c.422_423insCC;p.Glu143Ter	0.69	0.43	NA	SNV/indel	Nonsense	Loss of function	Somatic	Yes	Yes	Yes	NA	NA	NA	Male	14.27	Haem	AML	AML	Diagnosis	Prospective	BM	NA	BM crude lysate	Tumour only	N
17	55	PTEN	10:87957915	C>AG	c.697delinsAG;p.Arg234ThrfsTer9	0.44	0.2	NA	SNV/indel	Frameshift	Loss of function	Somatic	Yes	Yes	Yes	NA	NA	NA	Male	14.27	Haem	AML	AML	Diagnosis	Prospective	BM	NA	BM crude lysate	Tumour only	N
17	58	ETV6	12:11493846-19530229	NA	LOSS(1)	NA	NA	12p13.2;12p12.3	CNV	Loss	Heterozygous loss	Somatic	Yes	Yes	Yes	NA	NA	NA	Male	14.27	Haem	AML	AML	Diagnosis	Prospective	BM	NA	BM crude lysate	Tumour only	N
17	59	EGR1	5:105046232-149366833	NA	LOSS(1)	NA	NA	5q21.2;5q32	CNV	Loss	Heterozygous loss	Somatic	Yes	Yes	Yes	NA	NA	NA	Male	14.27	Haem	AML	AML	Diagnosis	Prospective	BM	NA	BM crude lysate	Tumour only	N
17	56	U2AF1	21:43104343	C>A	c.104G>T;p.Arg35Leu	NA	0.19	NA	SNV/indel	Missense	Loss of function	Somatic	Yes	No	Yes	Technical	Pipeline problem	NHS WGS mapping issue with U2AF1 on build 38.	Male	14.27	Haem	AML	AML	Diagnosis	Prospective	BM	NA	BM crude lysate	Tumour only	N
17	57	U2AF1	21:43104346	G>A	c.101C>T;p.Ser34Phe	NA	0.19	NA	SNV/indel	Missense	Loss of function	Somatic	Yes	No	Yes	Technical	Pipeline problem	NHS WGS mapping issue with U2AF1 on build 38.	Male	14.27	Haem	AML	AML	Diagnosis	Prospective	BM	NA	BM crude lysate	Tumour only	N
18	60	NRAS	1:114713907	T>G	c.183A>C;p.Gln61His	0.1	0.15	NA	SNV/indel	Missense	Activating	Somatic	Yes	Yes	Yes	NA	NA	NA	Male	9.07	Haem	AML	AML	Diagnosis	Prospective	BM	NA	BM crude lysate	Tumour only	N
18	61	NRAS	1:114713908	T>A	c.182A>T;p.Gln61Leu	0.11	0.12	NA	SNV/indel	Missense	Activating	Somatic	Yes	Yes	Yes	NA	NA	NA	Male	9.07	Haem	AML	AML	Diagnosis	Prospective	BM	NA	BM crude lysate	Tumour only	N
18	62	NRAS	1:114716123	C>T	c.38G>A;p.Gly13Asp	0.09	0.05	NA	SNV/indel	Missense	Activating	Somatic	Yes	Yes	Yes	NA	NA	NA	Male	9.07	Haem	AML	AML	Diagnosis	Prospective	BM	NA	BM crude lysate	Tumour only	N
18	63	CBFB::MYH11	16:15726512;16:67098332	NA	CBFB::MYH11	NA	NA	16p13.11;16q22.1	SV	Inversion	Gene fusion	Somatic	Yes	Yes	Yes	NA	NA	NA	Male	9.07	Haem	AML	AML	Diagnosis	Prospective	BM	NA	BM crude lysate	Tumour only	N
19	64	CCDC6::RET	10:43115446;10:59894325	NA	CCDC6::RET	NA	NA	10q11.21;10q21.2	SV	Inversion	Gene fusion	Somatic	NA	Yes	Yes	NA	NA	NA	Female	13.65	Solid	Thyroid	Papillary Thyroid Carcinoma	Diagnosis	Prospective	Tumour	PB	DNA	Tumour + germline	N
21	65	TRIM28	19:58548850-58549605	NA	inv (exon 11-13)	NA	NA	19q13.43	SV	Inversion	Disruptive rearrangement	Somatic	NA	Yes	Yes	NA	NA	NA	Male	1.22	Solid	Renal	Wilms Tumour	Diagnosis	Prospective	Tumour	PB	DNA	Tumour + germline	Y	No germline WT predisposition, nephrectomy post adjuvant chemo
21	66	TRIM28	19:58548033-58548462	NA	inv (exon 7-8)	NA	NA	19q13.43	SV	Inversion	Disruptive rearrangement	Somatic	NA	Yes	Yes	NA	NA	NA	Male	1.22	Solid	Renal	Wilms Tumour	Diagnosis	Prospective	Tumour	PB	DNA	Tumour + germline	Y	No germline WT predisposition, nephrectomy post adjuvant chemo
21	67	TRIM28	19:58546238-58548466	NA	inv (exon 4-8)	NA	NA	19q13.43	SV	Inversion	Disruptive rearrangement	Somatic	NA	Yes	Yes	NA	NA	NA	Male	1.22	Solid	Renal	Wilms Tumour	Diagnosis	Prospective	Tumour	PB	DNA	Tumour + germline	Y	No germline WT predisposition, nephrectomy post adjuvant chemo
21	68	TRIM28	19:58548026-58549535	NA	inv (exon 7-13)	NA	NA	19q13.43	SV	Inversion	Disruptive rearrangement	Somatic	NA	Yes	Yes	NA	NA	NA	Male	1.22	Solid	Renal	Wilms Tumour	Diagnosis	Prospective	Tumour	PB	DNA	Tumour + germline	Y	No germline WT predisposition, nephrectomy post adjuvant chemo
21	69	TRIM28	19:58547806-58549533	NA	dup (exon 6-13)	NA	NA	19q13.43	SV	Tandem duplication	Disruptive rearrangement	Somatic	NA	Yes	Yes	NA	NA	NA	Male	1.22	Solid	Renal	Wilms Tumour	Diagnosis	Prospective	Tumour	PB	DNA	Tumour + germline	Y	No germline WT predisposition, nephrectomy post adjuvant chemo
21	70	TRIM28	19:58549041-58549355	NA	del (exon 12-13)	NA	NA	19q13.43	SV	Deletion	Disruptive rearrangement	Somatic	NA	Yes	Yes	NA	NA	NA	Male	1.22	Solid	Renal	Wilms Tumour	Diagnosis	Prospective	Tumour	PB	DNA	Tumour + germline	Y	No germline WT predisposition, nephrectomy post adjuvant chemo
21	71	TRIM28	19:58547815-58548855	NA	del (exon 6-10)	NA	NA	19q13.43	SV	Deletion	Disruptive rearrangement	Somatic	NA	Yes	Yes	NA	NA	NA	Male	1.22	Solid	Renal	Wilms Tumour	Diagnosis	Prospective	Tumour	PB	DNA	Tumour + germline	Y	No germline WT predisposition, nephrectomy post adjuvant chemo
21	72	TRIM28	19:58543460-58549279	NA	del (exon 1-12)	NA	NA	19q13.43	SV	Deletion	Disruptive rearrangement	Somatic	NA	Yes	Yes	NA	NA	NA	Male	1.22	Solid	Renal	Wilms Tumour	Diagnosis	Prospective	Tumour	PB	DNA	Tumour + germline	Y	No germline WT predisposition, nephrectomy post adjuvant chemo
22	NA	NA	NA	NA	NA	NA	NA	NA	NA	NA	NA	NA	NA	NA	NA	NA	NA	NA	Male	0.04	Solid	Soft tissue	Fat necrosis	Diagnosis	Prospective	Tumour	PB	DNA	Tumour + germline	Y	Non-malignant diagnosis, observation only
24	73	BRAF	7:140753336	A>T	c.1799T>A;p.(Val600Glu)	0.23	0.23	7q34	SNV/indel	Missense	Activating	Somatic	NA	Yes	Yes	NA	NA	NA	Female	17.48	Solid	Thyroid	Papillary Thyroid Carcinoma	Diagnosis	Prospective	Tumour	PB	DNA	Tumour + germline	Y	BRAF V600E, PIK3CA targeted treatment available
24	74	PIK3CA	3:179218282	GATCCTCTCTCTG>CATCCTCTCTCTA	c.1612_1624delGATCCTCTCTCTGinsCATCCTCTCTCTA;p.(Asp538_Glu542delinsHisProLeuSerLys)	0.3	0.3	3q26.32	SNV/indel	In-frame delins	Activating	Somatic	NA	Yes	Yes	NA	NA	NA	Female	17.48	Solid	Thyroid	Papillary Thyroid Carcinoma	Diagnosis	Prospective	Tumour	PB	DNA	Tumour + germline	Y	BRAF V600E, PIK3CA targeted treatment available
25	75	FLT3	13:28036011	T>A	c.1342A>T;p.Ser448Cys	0.26	0.15	NA	SNV/indel	Missense	Activating	Somatic	Yes	Yes	Yes	NA	NA	NA	Female	1.21	Haem	AML	AML	Diagnosis	Prospective	BM	NA	BM crude lysate	Tumour only	N
25	76	KAT6A::NCOA2	8:41936874;8:70147591	NA	KAT6A::NCOA2	NA	NA	8p11.21;8q13.3	SV	Inversion	Gene fusion	Somatic	Yes	Yes	Yes	NA	NA	NA	Female	1.21	Haem	AML	AML	Diagnosis	Prospective	BM	NA	BM crude lysate	Tumour only	N
25	77	NA	NA	NA	Complex karyotype	NA	NA	NA	Cyto	NA	Other	Somatic	Yes	Yes	Yes	NA	NA	NA	Female	1.21	Haem	AML	AML	Diagnosis	Prospective	BM	NA	BM crude lysate	Tumour only	N
26	78	DICER1	14:95113190	GAGTAAACGGAT>G	c.1931_1941delATCCGTTTACT; p.(Asp644AlafsTer5)	Heterozygous	Heterozygous	14q32.13	SNV/indel	Frameshift	Loss of function	Germline	NA	Yes	Yes	NA	NA	NA	Male	11.3	Solid	CNS	Pineoblastoma	Diagnosis	Prospective	Tumour	PB	DNA	Tumour + germline	Y	Germline DICER1 variant, implications for radiotherapy dose, cascade testing for first degree relatives with family history of malignancy
26	79	DICER1	NA	NA	NA	NA	NA	chr14	Cyto	LOH(2)	Loss of heterozygosity	Somatic	NA	Yes	Yes	NA	NA	NA	Male	11.3	Solid	CNS	Pineoblastoma	Diagnosis	Prospective	Tumour	PB	DNA	Tumour + germline	Y	Germline DICER1 variant, implications for radiotherapy dose, cascade testing for first degree relatives with family history of malignancy
27	80	NA	NA	NA	NA	NA	NA	1q	Cyto	Gain	Other	Somatic	NA	Yes	NA	NA	Low purity sample	Uninformative sample for UF.	Male	15.49	Solid	Carcinoma	Nasopharyngeal carcinoma	Diagnosis	Prospective	Tumour	PB	DNA	Germline only	Y	Pharmacogenomic analysis of DPYD to treat with 5FU
27	81	NA	NA	NA	NA	NA	NA	chr8	Cyto	Gain	Other	Somatic	NA	Yes	NA	NA	Low purity sample	Uninformative sample for UF.	Male	15.49	Solid	Carcinoma	Nasopharyngeal carcinoma	Diagnosis	Prospective	Tumour	PB	DNA	Germline only	Y	Pharmacogenomic analysis of DPYD to treat with 5FU
28	82	KIAA1549::BRAF	7:138840982;7:140784910	NA	KIAA1549::BRAF	NA	NA	7q34	SV	Tandem duplication	Gene fusion	Somatic	NA	Yes	Yes	NA	NA	NA	Male	10.46	Solid	CNS	Pilocytic Astrocytoma	Diagnosis	Prospective	Tumour	PB	DNA	Tumour + germline	Y	Targeted treatment available on trial
29	83	APC	5:112838007	C>T	c.2413C>T;p.(Arg805Ter)	NA	0.37	5q22.2	SNV/indel	Nonsense	Loss of function	Somatic	NA	No	Yes	Biological	Tumour heterogeneity	Hypermutated. Additional likely driver mutations.	Male	11.19	Solid	Carcinoma	Colorectal carcinoma	Diagnosis	Prospective	Tumour	PB	DNA	Tumour + germline	Y	CMMRD diagnosis
29	84	APC	5:112838934	C>T	c.3340C>T;p.(Arg1114Ter)	NA	0.33	5q22.2	SNV/indel	Nonsense	Loss of function	Somatic	NA	No	Yes	Biological	Tumour heterogeneity	Hypermutated. Additional likely driver mutations.	Male	11.19	Solid	Carcinoma	Colorectal carcinoma	Diagnosis	Prospective	Tumour	PB	DNA	Tumour + germline	Y	CMMRD diagnosis
29	85	PIK3CA	3:179210291	G>A	c.1357G>A;p.(Glu453Lys)	NA	0.24	3q26.32	SNV/indel	Missense	Activating	Somatic	NA	No	Yes	Biological	Tumour heterogeneity	Hypermutated. Additional likely driver mutations.	Male	11.19	Solid	Carcinoma	Colorectal carcinoma	Diagnosis	Prospective	Tumour	PB	DNA	Tumour + germline	Y	CMMRD diagnosis
29	86	PIK3CA	3:179218303	G>A	c.1633G>A;p.(Glu545Lys)	NA	0.31	3q26.32	SNV/indel	Missense	Activating	Somatic	NA	No	Yes	Biological	Tumour heterogeneity	Hypermutated. Additional likely driver mutations.	Male	11.19	Solid	Carcinoma	Colorectal carcinoma	Diagnosis	Prospective	Tumour	PB	DNA	Tumour + germline	Y	CMMRD diagnosis
29	87	KRAS	12:25245347	C>T	c.38G>A;p.(Gly13Asp)	NA	0.26	12p12.1	SNV/indel	Missense	Activating	Somatic	NA	No	Yes	Biological	Tumour heterogeneity	Hypermutated. Additional likely driver mutations.	Male	11.19	Solid	Carcinoma	Colorectal carcinoma	Diagnosis	Prospective	Tumour	PB	DNA	Tumour + germline	Y	CMMRD diagnosis
29	88	APC	5:112815531	G>GT	c.875dupT;p.Leu292PhefsTer4	0.2	NA	5q22.2	SNV/indel	Frameshift	Loss of function	Somatic	NA	Yes	No	Biological	Tumour heterogeneity	Hypermutated. Additional likely driver mutations.	Male	11.19	Solid	Carcinoma	Colorectal carcinoma	Diagnosis	Prospective	Tumour	PB	DNA	Tumour + germline	Y	CMMRD diagnosis
29	89	APC	5:112839403	G>GT	c.3814dupT;p.Ser1272PhefsTer4	0.23	NA	5q22.2	SNV/indel	Frameshift	Loss of function	Somatic	NA	Yes	No	Biological	Tumour heterogeneity	Hypermutated. Additional likely driver mutations.	Male	11.19	Solid	Carcinoma	Colorectal carcinoma	Diagnosis	Prospective	Tumour	PB	DNA	Tumour + germline	Y	CMMRD diagnosis
29	90	TP53	17:7675085	C>T	c.527G>A;p.Cys176Tyr	0.27	NA	17p13.1	SNV/indel	Missense	Loss of function	Somatic	NA	Yes	No	Biological	Tumour heterogeneity	Hypermutated. Additional likely driver mutations.	Male	11.19	Solid	Carcinoma	Colorectal carcinoma	Diagnosis	Prospective	Tumour	PB	DNA	Tumour + germline	Y	CMMRD diagnosis
29	91	MSH6	2:47803500	A>AC	c.3261dupC;p.(Phe1088LeufsTer5)	Homozygous	Homozygous	2p16.3	SNV/indel	Frameshift	Loss of function	Germline	NA	Yes	Yes	NA	NA	NA	Male	11.19	Solid	Carcinoma	Colorectal carcinoma	Diagnosis	Prospective	Tumour	PB	DNA	Tumour + germline	Y	CMMRD diagnosis
31	92	TRIM28	19:58548041	CTG>C	c.963_964delTG;p.(Glu322GlyfsTer34)	0.92	0.92	19q13.43	SNV/indel	Frameshift	Loss of function	Somatic	NA	Yes	Yes	NA	NA	NA	Male	0.63	Solid	Renal	Wilms Tumour	Diagnosis	Retrospective	DNA extracted from PB	DNA extracted from tumour	DNA	Tumour + germline	N
31	93	NA	NA	NA	NA	NA	NA	19q13.42-q13.43	Cyto	LOH(2)	Loss of heterozygosity	Somatic	NA	Yes	Yes	NA	NA	NA	Male	0.63	Solid	Renal	Wilms Tumour	Diagnosis	Retrospective	DNA extracted from PB	DNA extracted from tumour	DNA	Tumour + germline	N
32	NA	NA	NA	NA	NA	NA	NA	NA	NA	NA	NA	NA	NA	NA	NA	NA	NA	NA	Female	1.48	Solid	Sarcoma	Rhabdomyosarcoma	Diagnosis	Retrospective	DNA extracted from PB	DNA extracted from tumour	DNA	Tumour + germline	Y	RMS signature, no DICER1
33	94	PDGFRB	5:150119945	NA	p.Leu865-Leu899dup	NA	NA	5q32	SV	Internal tandem duplication	Activating rearrangement	Somatic	NA	Yes	Yes	NA	NA	NA	Male	0.04	Solid	Soft tissue	Infantile Fibromyoma	Diagnosis	Retrospective	DNA extracted from PB	DNA extracted from tumour	DNA	Tumour + germline	Y	PDGFRB mutation, observation only
34	95	DICER1	14:95091291	C>A	c.5439G>T;p.(Glu1813Asp)	0.5	0.5	14q32.13	SNV/indel	Missense	Activating	Somatic	NA	Yes	Yes	NA	NA	NA	Female	10.75	Solid	Soft tissue	Malignant peripheral nerve sheath tumour	Diagnosis	Retrospective	DNA extracted from PB	DNA extracted from tumour	DNA	Tumour + germline	N
34	96	EP300	22:41176894	G>GCGATTCT	c.5186_5192dupATTCTCG;p.(Arg1732PhefsTer153)	0.5	0.49	22q13.2	SNV/indel	Frameshift	Loss of function	Somatic	NA	Yes	Yes	NA	NA	NA	Female	10.75	Solid	Soft tissue	Malignant peripheral nerve sheath tumour	Diagnosis	Retrospective	DNA extracted from PB	DNA extracted from tumour	DNA	Tumour + germline	N
34	97	DICER1	14:95106039	AC>A	c.2987+1delG	Heterozygous	Heterozygous	14q32.13	SNV/indel	Splice site	Loss of function	Germline	NA	Yes	Yes	NA	NA	NA	Female	10.75	Solid	Soft tissue	Malignant peripheral nerve sheath tumour	Diagnosis	Retrospective	DNA extracted from PB	DNA extracted from tumour	DNA	Tumour + germline	N
34	98	BRIP1	17:61801348	C>G	c.1045G>C;p.(Ala349Pro)	Heterozygous	Heterozygous	17q23.2	SNV/indel	Missense	Loss of function	Germline	NA	Yes	Yes	NA	NA	NA	Female	10.75	Solid	Soft tissue	Malignant peripheral nerve sheath tumour	Diagnosis	Retrospective	DNA extracted from PB	DNA extracted from tumour	DNA	Tumour + germline	N
36	99	KLC1::RAF1	14:103687554;3:12605695	NA	KLC1::RAF1	NA	NA	14q32.33;3p25.2	SV	Translocation	Gene fusion	Somatic	NA	Yes	Yes	NA	NA	NA	Female	0.16	Solid	LCH	LCH	Diagnosis	Retrospective	DNA extracted from PB	DNA extracted from tumour	DNA	Tumour + germline	Y	Novel KLC1-RAF1 fusion, targetable with MEKii
37	100	BRCA2	13:32357817	G>T	c.7693G>T;p.(Glu2565Ter)	0.16	0.16	13q13.1	SNV/indel	Nonsense	Loss of function	Somatic	NA	Yes	Yes	NA	NA	NA	Male	8.62	Haem	Lymphoma	Anaplastic Large Cell Lymphoma	Diagnosis	Retrospective	DNA extracted from PB	DNA extracted from tumour	DNA	Tumour + germline	Y	NPM1::ALK fusion confirms ALCL diagnosis, clinical trials with targeted treatment available
37	101	ARID1A	1:26697232	GGCGGCCCCTCC>G	c.836_846delCCTCCGCGGCC;p.(Pro279ArgfsTer117)	0.21	0.21	1p36.11	SNV/indel	Frameshift	Loss of function	Somatic	NA	Yes	Yes	NA	NA	NA	Male	8.62	Haem	Lymphoma	Anaplastic Large Cell Lymphoma	Diagnosis	Retrospective	DNA extracted from PB	DNA extracted from tumour	DNA	Tumour + germline	Y	NPM1::ALK fusion confirms ALCL diagnosis, clinical trials with targeted treatment available
37	102	NPM1::ALK	5:171391938;2:29225146	NA	NPM1::ALK	NA	NA	5q35.1;2p23.2	SV	Translocation	Gene fusion	Somatic	NA	Yes	Yes	NA	NA	NA	Male	8.62	Haem	Lymphoma	Anaplastic Large Cell Lymphoma	Diagnosis	Retrospective	DNA extracted from PB	DNA extracted from tumour	DNA	Tumour + germline	Y	NPM1::ALK fusion confirms ALCL diagnosis, clinical trials with targeted treatment available
38	103	OMD::USP6	9:92419935;17:5128414	NA	OMD::USP6	NA	NA	9q22.31;17p13.2	SV	Translocation	Gene fusion	Somatic	NA	Yes	Yes	NA	NA	NA	Male	12.07	Solid	Soft tissue	Aneurysmal bone cyst	Diagnosis	Retrospective	DNA extracted from PB	DNA extracted from tumour	DNA	Tumour + germline	Y	USP6 fusion, bone cyst, avoided mutilating surgery, curettage only
40	104	PLAGL2	20:32147528-32341501	NA	GAIN(73)	NA	NA	20q11.21	CNV	Gain	Amplification (73 copies)	Somatic	NA	Yes	Yes	NA	NA	NA	Male	2.01	Solid	CNS	PLAGL2-amplified embryonal tumour	Diagnosis	Retrospective	DNA extracted from PB	DNA extracted from tumour	DNA	Tumour + germline	Y	PLAGL-2 tumour - more aggressive, would have received Headstart rather than EuRhab chemo
41	105	NOTCH1	9:136496196	C>A	c.7543G>T;p.Glu2515Ter	0.48	0.46	NA	SNV/indel	Nonsense	Activating	Somatic	NA	Yes	Yes	NA	NA	NA	Male	4.14	Haem	T ALL	T-Cell ALL	Diagnosis	Retrospective	DNA extracted from PB	DNA extracted from tumour	DNA	Tumour + germline	N
41	106	NRAS	1:114716123	C>T	c.38G>A;p.Gly13Asp	0.46	0.51	NA	SNV/indel	Missense	Activating	Somatic	NA	Yes	Yes	NA	NA	NA	Male	4.14	Haem	T ALL	T-Cell ALL	Diagnosis	Retrospective	DNA extracted from PB	DNA extracted from tumour	DNA	Tumour + germline	N
41	107	ETV6	12:11884535	T>GG	c.1100delinsGG;p.Ile367ArgfsTer18	0.61	0.57	NA	SNV/indel	Frameshift	Loss of function	Somatic	NA	Yes	Yes	NA	NA	NA	Male	4.14	Haem	T ALL	T-Cell ALL	Diagnosis	Retrospective	DNA extracted from PB	DNA extracted from tumour	DNA	Tumour + germline	N
41	108	HIBADH::ETV6	7:27587527;12:11782727	NA	HIBADH::ETV6	NA	NA	7p15.2;12p13.2	SV	Translocation	Gene fusion	Somatic	No	Yes	Yes	Technical	No SOC assay able to detect	Concordant between NHS WGS vs UF	Male	4.14	Haem	T ALL	T-Cell ALL	Diagnosis	Retrospective	DNA extracted from PB	DNA extracted from tumour	DNA	Tumour + germline	N
42	109	KIT	4:54733155	A>T	c.2447A>T;p.(Asp816Val)	0.34	0.34	4q12	SNV/indel	Missense	Activating	Somatic	NA	Yes	Yes	NA	NA	NA	Female	7.97	Solid	Ovarian	Malignant germ cell tumour of ovary	Diagnosis	Retrospective	DNA extracted from PB	DNA extracted from tumour	DNA	Tumour + germline	N
42	110	PTEN	10:87933160	T>C	c.401T>C;p.(Met134Thr)	Heterozygous	Heterozygous	10q23.31	SNV/indel	Missense	Loss of function	Germline	NA	Yes	Yes	NA	NA	NA	Female	7.97	Solid	Ovarian	Malignant germ cell tumour of ovary	Diagnosis	Retrospective	DNA extracted from PB	DNA extracted from tumour	DNA	Tumour + germline	N
42	111	NA	NA	NA	NA	NA	NA	10q	Cyto	LOH(2)	Loss of heterozygosity	Somatic	NA	Yes	Yes	NA	NA	NA	Female	7.97	Solid	Ovarian	Malignant germ cell tumour of ovary	Diagnosis	Retrospective	DNA extracted from PB	DNA extracted from tumour	DNA	Tumour + germline	N
43	112	SDHB	1:17044882	G>T	c.79C>T;p.(Arg27Ter)	Heterozygous	Heterozygous	1p36.13	SNV/indel	Nonsense	Loss of function	Germline	NA	Yes	Yes	NA	NA	NA	Male	14.27	Solid	Soft tissue	SDHB deficient paraganglioma	Diagnosis	Retrospective	DNA extracted from PB	DNA extracted from tumour	DNA	Tumour + germline	N
43	113	NA	NA	NA	NA	NA	NA	1q	Cyto	Gain	Other	Somatic	NA	Yes	Yes	NA	NA	NA	Male	14.27	Solid	Soft tissue	SDHB deficient paraganglioma	Diagnosis	Retrospective	DNA extracted from PB	DNA extracted from tumour	DNA	Tumour + germline	N
43	114	NA	NA	NA	NA	NA	NA	1p	Cyto	Loss	Loss of heterozygosity	Somatic	NA	Yes	Yes	NA	NA	NA	Male	14.27	Solid	Soft tissue	SDHB deficient paraganglioma	Diagnosis	Retrospective	DNA extracted from PB	DNA extracted from tumour	DNA	Tumour + germline	N
44	115	FOSL1	11:65892957-14:51647926	NA	FOSL1 rearrangement	NA	NA	11q13.1	SV	Translocation	Activating rearrangement	Somatic	NA	Yes	Yes	NA	NA	NA	Female	1.13	Solid	Soft tissue	Fibroma	Diagnosis	Retrospective	DNA extracted from PB	DNA extracted from tumour	DNA	Tumour + germline	N
46	116	ATXN1::NUTM2D	6:16303813-10:87364730	NA	ATXN1::NUTM2D	NA	NA	6p22.3;10q23.2	SV	Translocation	Gene fusion	Somatic	NA	Yes	Yes	NA	NA	NA	Male	0.36	Solid	CNS	High grade embryonal brain tumour	Diagnosis	Retrospective	DNA extracted from PB	DNA extracted from tumour	DNA	Tumour + germline	Y	ATXN1::NUTM2D novel fusion, aggressive, offer palliation at diagnosis
48	117	PVT1	8:127919530-128740455	NA	MYC enhancer rearrangement	NA	NA	8q24.21	SV	Inversion	Activating rearrangement	Somatic	NA	Yes	Yes	NA	NA	NA	Male	2.77	Solid	CNS	Metastatic medulloblastoma	Diagnosis	Retrospective	DNA extracted from PB	DNA extracted from tumour	DNA	Tumour + germline	N
49	118	ACVR1	2:157774114	C>T	c.617G>A;p.(Arg206His)	NA	0.45	2q24.1	SNV/indel	Missense	Activating	Germline	NA	No	Yes	Technical	Pipeline problem	UF tumour only sequencing. Incidental germline finding.	Female	12.82	Solid	Soft tissue	FOP	Diagnosis	Prospective	Tumour	PB	DNA	Tumour + germline	Y	ACVR1 germline mutation, no further surgery, no chemo, targeted treatment
50	119	CDK4	12:57324179-58635884	NA	GAIN(36)	NA	NA	12q13.3-q14.1	CNV	Gain	Amplification (36 copies)	Somatic	NA	Yes	Yes	NA	NA	NA	Male	4.35	Solid	Neuroblastoma	Neuroblastoma	Diagnosis	Retrospective	DNA extracted from PB	DNA extracted from tumour	DNA	Tumour + germline	N
50	120	MDM2	12:68668207-70477726	NA	GAIN(33)	NA	NA	12q15	CNV	Gain	Amplification (33 copies)	Somatic	NA	Yes	Yes	NA	NA	NA	Male	4.35	Solid	Neuroblastoma	Neuroblastoma	Diagnosis	Retrospective	DNA extracted from PB	DNA extracted from tumour	DNA	Tumour + germline	N
51	121	BRAF	7:140753336	A>T	c.1799T>A;p.(Val600Glu)	0.46	0.46	7q34	SNV/indel	Missense	Activating	Somatic	NA	Yes	Yes	NA	NA	NA	Male	9.83	Solid	CNS	Pleomorphic Xanthoastrocytoma	Diagnosis	Retrospective	DNA extracted from PB	DNA extracted from tumour	DNA	Tumour + germline	Y	BRAF V600E, targeted treatment available
51	122	CDKN2B	9:21608319-24483693	NA	LOSS(0)	NA	NA	9p21.3	CNV	Loss	Homozygous loss	Somatic	NA	Yes	Yes	NA	NA	NA	Male	9.83	Solid	CNS	Pleomorphic Xanthoastrocytoma	Diagnosis	Retrospective	DNA extracted from PB	DNA extracted from tumour	DNA	Tumour + germline	Y	BRAF V600E, targeted treatment available
51	123	CDKN2A	9:21608319-24483693	NA	LOSS(0)	NA	NA	9p21.3	CNV	Loss	Homozygous loss	Somatic	NA	Yes	Yes	NA	NA	NA	Male	9.83	Solid	CNS	Pleomorphic Xanthoastrocytoma	Diagnosis	Retrospective	DNA extracted from PB	DNA extracted from tumour	DNA	Tumour + germline	Y	BRAF V600E, targeted treatment available
52	124	NKD2::BRAF	5:1030366;7:140791581	NA	NKD2::BRAF	NA	NA	5p15.33;7q34	SV	Translocation	Gene fusion	Somatic	NA	Yes	Yes	NA	NA	NA	Female	7.36	Solid	Carcinoma	Pancreatic acinic cell carcinoma	Diagnosis	Prospective	DNA extracted from PB	DNA extracted from tumour	DNA	Tumour + germline	Y	BRAF fusion, eligible for MEKi as no curable treatment available
53	125	NF1	17:31261733	C>T	c.4600C>T;p.(Arg1534Ter)	0.97	0.97	17q11.2	SNV/indel	Nonsense	Loss of function	Somatic	NA	Yes	Yes	NA	NA	NA	Female	1.93	Solid	Sarcoma	Rhabdomyosarcoma	Diagnosis	Retrospective	DNA extracted from PB	DNA extracted from tumour	DNA	Tumour + germline	N
53	126	NA	NA	NA	NA	NA	NA	chr17	Cyto	LOH(2)	Loss of heterozygosity	Somatic	NA	Yes	Yes	NA	NA	NA	Female	1.93	Solid	Sarcoma	Rhabdomyosarcoma	Diagnosis	Retrospective	DNA extracted from PB	DNA extracted from tumour	DNA	Tumour + germline	N
54	127	NA	NA	NA	NA	NA	NA	chr7, 8, 11, 12, 13, 15, 18, 20	Cyto	Gain	Other	Somatic	NA	Yes	Yes	NA	NA	NA	Male	0.25	Solid	CNS	Atypical Choroid Plexus Tumour	Diagnosis	Prospective	Tumour	PB	DNA	Tumour + germline	N
54	128	NA	NA	NA	NA	NA	NA	chr6, 10	Cyto	LOH(2)	Loss of heterozygosity	Somatic	NA	Yes	Yes	NA	NA	NA	Male	0.25	Solid	CNS	Atypical Choroid Plexus Tumour	Diagnosis	Prospective	Tumour	PB	DNA	Tumour + germline	N
55	129	PTCH1	9:95481979	GC>G	c.715delG;p.(Ala239ArgfsTer11)	Heterozygous	Heterozygous	9q22.32	SNV/indel	Frameshift	Loss of function	Germline	NA	Yes	Yes	NA	NA	NA	Female	8.23	Solid	Ovarian	Ovarian Fibroma	Diagnosis	Prospective	Tumour	PB	DNA	Tumour + germline	N	Known germline PTCH1 mutation, Gorlin Syndrome
55	130	NA	NA	NA	NA	NA	NA	9q	Cyto	Loss	Loss of heterozygosity	Somatic	NA	Yes	Yes	NA	NA	NA	Female	8.23	Solid	Ovarian	Ovarian Fibroma	Diagnosis	Prospective	Tumour	PB	DNA	Tumour + germline	N	Known germline PTCH1 mutation, Gorlin Syndrome
58	131	BCOR::CCNB3	X:40050796;X:50308052	NA	BCOR::CCNB3	NA	NA	Xp11.4;Xp11.22	SV	Inversion	Gene fusion	Somatic	NA	Yes	No	Technical	Pipeline problem	Breakpoint in untranslated region. Solved in new UF pipeline.	Male	6.5	Solid	Sarcoma	BCOR Sarcoma	Relapse	Prospective	Tumour	PB	DNA	Tumour + germline	N
59	132	KMT2A	11:118521372	CCG>A	c.11598_11600delCCGinsA;p.(Arg3867LeufsTer5)	0.47	0.47	11q23.3	SNV/indel	Frameshift	Loss of function	Somatic	NA	Yes	Yes	NA	NA	NA	Female	9.34	Solid	Renal	Renal Cell Carcinoma	Relapse	Prospective	Tumour	PB	DNA	Tumour + germline	Y	Mixed RCC and Wilms, same as diagnosis, treated with Wilms directed therapy
59	133	AMER1	X:63697196-64234438	NA	Deletion	NA	NA	Xq11.1-q11.2	SV	Loss	Heterozygous loss	Somatic	NA	Yes	Yes	NA	NA	NA	Female	9.34	Solid	Renal	Renal Cell Carcinoma	Relapse	Prospective	Tumour	PB	DNA	Tumour + germline	Y	Mixed RCC and Wilms, same as diagnosis, treated with Wilms directed therapy
60	134	BCR::ABL1	9:130848423;22:23207455	NA	BCR::ABL1	NA	NA	9q34.12;22q11.23	SV	Translocation	Gene fusion	Somatic	Yes	Yes	Yes	NA	NA	NA	Female	15.35	Haem	B ALL	Philadelphia +ve ALL	Diagnosis	Prospective	BM	NA	BM crude lysate	Tumour only	Y	BCR::ABL fusion, treated with TKI from diagnosis
60	135	CDKN2A	9:22007658-28500785	NA	LOSS(0)	NA	NA	9p21.3	CNV	Loss	Homozygous loss	Somatic	Yes	Yes	Yes	NA	NA	NA	Female	15.35	Haem	B ALL	Philadelphia +ve ALL	Diagnosis	Prospective	BM	NA	BM crude lysate	Tumour only	Y	BCR::ABL fusion, treated with TKI from diagnosis
60	137	PAX5	9:36979169-37030697	NA	Deletion	NA	NA	9p13.2	SV	Deletion	Heterozygous loss	Somatic	Yes	Yes	Yes	NA	NA	NA	Female	15.35	Haem	B ALL	Philadelphia +ve ALL	Diagnosis	Prospective	BM	NA	BM crude lysate	Tumour only	Y	BCR::ABL fusion, treated with TKI from diagnosis
60	138	IKZF1	7:50345190;7:50395934	NA	LOSS(0)	NA	NA	7p12.2	SV	Deletion	Homozygous loss	Somatic	Yes	Yes	Yes	NA	NA	NA	Female	15.35	Haem	B ALL	Philadelphia +ve ALL	Diagnosis	Prospective	BM	NA	BM crude lysate	Tumour only	Y	BCR::ABL fusion, treated with TKI from diagnosis
60	136	CDKN2B	9:22007658-28500785	NA	LOSS(0)	NA	NA	9p21.3	CNV	Loss	Homozygous loss	Somatic	No	Yes	Yes	Technical	Assay	Limited resolution by SNP array	Female	15.35	Haem	B ALL	Philadelphia +ve ALL	Diagnosis	Prospective	BM	NA	BM crude lysate	Tumour only	Y	BCR::ABL fusion, treated with TKI from diagnosis
66	146	NUP214::ABL1	9:130812506;9:131220141	NA	NUP214::ABL1	NA	NA	9q34.12;9q34.13	SV	Tandem duplication	Gene fusion	Somatic	No	Yes	No	Biological	Weak evidence	Low support in GMS WGS (5 PR, 3 SR). SOC RNA fusion panel in progress for orthogonal validation.	Male	9.66	Haem	Lymphoma	T-lymphoblastic lymphoma	Diagnosis	Prospective	Pleural Fluid	PB	pleural fluid/PB crude lysate	Tumour only	Y	Diagnosis yielded from pleural fluid, no biopsy required, clinically unsafe
66	139	FBXW7	4:152350076	C>A	c.550G>T;p.Gly184Ter	0.97	0.96	NA	SNV/indel	Nonsense	Loss of function	Somatic	NA	Yes	Yes	NA	N	NA	Male	9.66	Haem	Lymphoma	T-lymphoblastic lymphoma	Diagnosis	Prospective	Pleural Fluid	PB	pleural fluid/PB crude lysate	Tumour only	Y	Diagnosis yielded from pleural fluid, no biopsy required, clinically unsafe
66	140	CDKN2A	9:21884863-22084674	NA	LOSS(0)	NA	NA	9p21.3	CNV	Loss	Homozygous loss	Somatic	Yes	Yes	Yes	NA	NA	NA	Male	9.66	Haem	Lymphoma	T-lymphoblastic lymphoma	Diagnosis	Prospective	Pleural Fluid	PB	pleural fluid/PB crude lysate	Tumour only	Y	Diagnosis yielded from pleural fluid, no biopsy required, clinically unsafe
66	141	CDKN2B	9:21884863-22084674	NA	LOSS(0)	NA	NA	9p21.3	CNV	Loss	Homozygous loss	Somatic	Yes	Yes	Yes	NA	NA	NA	Male	9.66	Haem	Lymphoma	T-lymphoblastic lymphoma	Diagnosis	Prospective	Pleural Fluid	PB	pleural fluid/PB crude lysate	Tumour only	Y	Diagnosis yielded from pleural fluid, no biopsy required, clinically unsafe
66	142	NF1	17:31095017-31157520	NA	LOSS(0)	NA	NA	17q11.2	CNV	Loss	Homozygous loss	Somatic	Yes	Yes	Yes	NA	NA	NA	Male	9.66	Haem	Lymphoma	T-lymphoblastic lymphoma	Diagnosis	Prospective	Pleural Fluid	PB	pleural fluid/PB crude lysate	Tumour only	Y	Diagnosis yielded from pleural fluid, no biopsy required, clinically unsafe
66	143	NA	NA	NA	GAIN(3)	NA	NA	21q11.2-q22.3	CNV	Gain	Trisomy 21	Germline	Yes	Yes	Yes	NA	NA	NA	Male	9.66	Haem	Lymphoma	T-lymphoblastic lymphoma	Diagnosis	Prospective	Pleural Fluid	PB	pleural fluid/PB crude lysate	Tumour only	Y	Diagnosis yielded from pleural fluid, no biopsy required, clinically unsafe
66	144	NA	NA	NA	Complex karyotype	NA	NA	NA	Cyto	NA	Other	Somatic	Yes	Yes	Yes	NA	NA	NA	Male	9.66	Haem	Lymphoma	T-lymphoblastic lymphoma	Diagnosis	Prospective	Pleural Fluid	PB	pleural fluid/PB crude lysate	Tumour only	Y	Diagnosis yielded from pleural fluid, no biopsy required, clinically unsafe
66	145	NA	19:253584-20413068	NA	NA	NA	NA	chr19	Cyto	LOH(2)	Loss of heterozygosity	Somatic	Yes	Yes	Yes	NA	NA	NA	Male	9.66	Haem	Lymphoma	T-lymphoblastic lymphoma	Diagnosis	Prospective	Pleural Fluid	PB	pleural fluid/PB crude lysate	Tumour only	Y	Diagnosis yielded from pleural fluid, no biopsy required, clinically unsafe
66	147	TLX3	5:171278280;14:98548451	NA	TLX3-rearrangement	NA	NA	5q35.1	SV	Translocation	Activating rearrangement	Somatic	Yes	Yes	Yes	NA	NA	NA	Male	9.66	Haem	Lymphoma	T-lymphoblastic lymphoma	Diagnosis	Prospective	Pleural Fluid	PB	pleural fluid/PB crude lysate	Tumour only	Y	Diagnosis yielded from pleural fluid, no biopsy required, clinically unsafe
67	148	PATZ1	22:31345586;22:35406264	NA	MN1::PATZ1	NA	NA	22q12.2	SV	Inversion	Gene fusion	Somatic	NA	Yes	Yes	NA	NA	NA	Female	7.21	Solid	CNS	Neuroepithelial tumour	Diagnosis	Retrospective	DNA extracted from PB	DNA extracted from tumour	DNA	Tumour + germline	N	Breakpoint in PATZ1 exon 1 with complex rearragement focal to chr22, consistent with a neuroepthelial tumour with PATZ1 fusion.
68	149	GATA1	X:48791210	T>TC	c.105dup;p.Ser36LeufsTer4	0.56	0.83	NA	SNV/indel	Frameshift	Loss of function	Somatic	Yes	NA	Yes	NA	NA	No NHS WGS	Male	0.06	Haem	TAM	Transient leukaemia Down Syndrome	Diagnosis	Prospective	PB	NA	PB crude lysate	Tumour only	Y	Confirmed GATA1 variant, consistent with TAM, likely germline T21 consistent with clinical features
68	150	NA	NA	NA	GAIN(3)	NA	NA	21q11.2-q22.3	CNV	Gain	Trisomy 21	Germline	Yes	NA	Yes	NA	NA	No NHS WGS	Male	0.06	Haem	TAM	Transient leukaemia Down Syndrome	Diagnosis	Prospective	PB	NA	PB crude lysate	Tumour only	Y	Confirmed GATA1 variant, consistent with TAM, likely germline T21 consistent with clinical features
69	151	PMS2	7:5986933	A>AT	c.1832dupA;p.Ile611AsnfsTer2	Heterozygous	Heterozygous	7p22.1	SNV/indel	Frameshift	Loss of function	Germline	NA	Yes	Yes	NA	NA	NA	Female	4.32	Solid	CNS	Ependymoma	Diagnosis	Retrospective	NA	DNA extracted from PB	DNA	Germline only	Y	PMS2 detected with proximity mapping, CMMRD confirmed, avoid ionising radiation
69	152	PMS2	7:5982372-5983278	NA	Deletion (exon 12)	NA	Heterozygous	7p22.1	SV	Deletion	Loss of function	Germline	NA	No	Yes	Technical	Pipeline problem	UF could discrimiate genuine PMS2 exon 12 deletion from pseudogene	Female	4.32	Solid	CNS	Ependymoma	Diagnosis	Retrospective	NA	DNA extracted from PB	DNA	Germline only	Y	PMS2 detected with proximity mapping, CMMRD confirmed, avoid ionising radiation

## Sheet: Supp Table 6A
GENE_NAME	TRANSCRIPT_ID	TRANSCRIPT_TYPE	REGION
ABI1	ENST00000376142.6	protein_coding
ABL1	ENST00000372348.6	protein_coding
ABL2	ENST00000502732.5	protein_coding
ACD	ENST00000620338.4	protein_coding
ACKR3	ENST00000272928.3	protein_coding
ACSL3	ENST00000357430.7	protein_coding
ACVR1	ENST00000263640.7	protein_coding
ACVR2A	ENST00000241416.11	protein_coding
AFDN	ENST00000392112.5	protein_coding
AFF1	ENST00000395146.8	protein_coding
AFF3	ENST00000409579.5	protein_coding
AFF4	ENST00000265343.9	protein_coding
AKT1	ENST00000555528.5	protein_coding
AKT2	ENST00000392038.6	protein_coding
ALK	ENST00000389048.7	protein_coding
AMER1	ENST00000330258.3	protein_coding
ANKRD26	ENST00000376087.4	protein_coding
APC	ENST00000508376.6	protein_coding
AR	ENST00000374690.8	protein_coding
ARAF	ENST00000377045.8	protein_coding
ARHGAP26	ENST00000274498.8	protein_coding
ARHGEF12	ENST00000397843.6	protein_coding
ARID1A	ENST00000324856.11	protein_coding
ARID1B	ENST00000346085.9	protein_coding
ARID2	ENST00000334344.10	protein_coding
ARNT	ENST00000358595.9	protein_coding
ASPSCR1	ENST00000306729.11	protein_coding
ASXL1	ENST00000375687.8	protein_coding
ATF1	ENST00000262053.7	protein_coding
ATIC	ENST00000236959.13	protein_coding
ATM	ENST00000278616.8	protein_coding
ATP1A1	ENST00000295598.9	protein_coding
ATP2B3	ENST00000263519.4	protein_coding
ATR	ENST00000350721.8	protein_coding
ATRX	ENST00000373344.9	protein_coding
AXIN1	ENST00000262320.7	protein_coding
AXIN2	ENST00000307078.9	protein_coding
B2M	ENST00000558401.5	protein_coding
BAP1	ENST00000460680.5	protein_coding
BARD1	ENST00000260947.8	protein_coding
BAX	ENST00000345358.11	protein_coding
BCL10	ENST00000370580.5	protein_coding
BCL11A	ENST00000356842.8	protein_coding
BCL11B	ENST00000357195.7	protein_coding
BCL2	ENST00000398117.1	protein_coding
BCL3	ENST00000164227.9	protein_coding
BCL6	ENST00000406870.6	protein_coding
BCL7A	ENST00000538010.5	protein_coding
BCL9	ENST00000234739.7	protein_coding
BCL9L	ENST00000334801.7	protein_coding
BCOR	ENST00000378444.8	protein_coding
BCORL1	ENST00000540052.5	protein_coding
BCR	ENST00000305877.12	protein_coding
BIRC3	ENST00000615299.4	protein_coding
BLM	ENST00000355112.7	protein_coding
BRAF	ENST00000288602.10	protein_coding
BRCA1	ENST00000357654.7	protein_coding
BRCA2	ENST00000544455.5	protein_coding
BRD3	ENST00000303407.11	protein_coding
BRD4	ENST00000263377.6	protein_coding
BRIP1	ENST00000259008.6	protein_coding
BTG1	ENST00000256015.4	protein_coding
BTK	ENST00000308731.7	protein_coding
CACNA1D	ENST00000288139.9	protein_coding
CALR	ENST00000316448.9	protein_coding
CAMTA1	ENST00000303635.11	protein_coding
CANT1	ENST00000591773.5	protein_coding
CARD11	ENST00000396946.8	protein_coding
CARS	ENST00000380525.8	protein_coding
CASP8	ENST00000264275.9	protein_coding
CBFA2T3	ENST00000268679.8	protein_coding
CBFB	ENST00000412916.6	protein_coding
CBL	ENST00000264033.5	protein_coding
CBLB	ENST00000264122.8	protein_coding
CBLC	ENST00000270279.7	protein_coding
CCDC6	ENST00000263102.6	protein_coding
CCNB1IP1	ENST00000358932.8	protein_coding
CCND1	ENST00000227507.2	protein_coding
CCND2	ENST00000261254.7	protein_coding
CCND3	ENST00000372991.8	protein_coding
CCNE1	ENST00000262643.7	protein_coding
CD274	ENST00000381577.3	protein_coding
CD74	ENST00000009530.11	protein_coding
CD79A	ENST00000221972.7	protein_coding
CD79B	ENST00000392795.7	protein_coding
CDC73	ENST00000367435.3	protein_coding
CDH1	ENST00000261769.9	protein_coding
CDH11	ENST00000268603.8	protein_coding
CDK12	ENST00000447079.4	protein_coding
CDK6	ENST00000265734.8	protein_coding
CDKN1B	ENST00000228872.8	protein_coding
CDKN2A	ENST00000304494.9	protein_coding
CDKN2B	ENST00000380142.4	protein_coding
CDKN2C	ENST00000396148.1	protein_coding
CDX2	ENST00000381020.7	protein_coding
CEBPA	ENST00000498907.2	protein_coding
CHCHD7	ENST00000303759.3	protein_coding
CHD4	ENST00000357008.6	protein_coding
CHEK2	ENST00000328354.10	protein_coding
CIC	ENST00000575354.6	protein_coding
CIITA	ENST00000324288.12	protein_coding
CKS1B	ENST00000308987.5	protein_coding
CLIP1	ENST00000358808.6	protein_coding
CLIP3	ENST00000360535.8	protein_coding
CLTC	ENST00000269122.7	protein_coding
CLTCL1	ENST00000427926.5	protein_coding
CNBP	ENST00000422453.6	protein_coding
CNOT3	ENST00000221232.9	protein_coding
CNTRL	ENST00000238341.9	protein_coding
COL1A1	ENST00000225964.9	protein_coding
COL2A1	ENST00000380518.7	protein_coding
CREB1	ENST00000432329.6	protein_coding
CREB3L1	ENST00000621158.4	protein_coding
CREB3L2	ENST00000330387.10	protein_coding
CREBBP	ENST00000262367.9	protein_coding
CRLF2	ENST00000400841.7	protein_coding
CRTC1	ENST00000338797.10	protein_coding
CRTC3	ENST00000268184.10	protein_coding
CSF1R	ENST00000286301.7	protein_coding
CSF2RA	ENST00000417535.7	protein_coding
CSF3R	ENST00000373103.5	protein_coding
CTC1	ENST00000315684.12	protein_coding
CTCF	ENST00000264010.8	protein_coding
CTNNB1	ENST00000349496.9	protein_coding
CUX1	ENST00000437600.8	protein_coding
CXCR4	ENST00000241393.3	protein_coding
CYLD	ENST00000311559.13	protein_coding
DAXX	ENST00000374542.9	protein_coding
DCTN1	ENST00000361874.7	protein_coding
DDIT3	ENST00000346473.7	protein_coding
DDR2	ENST00000367922.7	protein_coding
DDX10	ENST00000322536.7	protein_coding
DDX3X	ENST00000399959.6	protein_coding
DDX41	ENST00000507955.5	protein_coding
DDX5	ENST00000225792.9	protein_coding
DDX6	ENST00000534980.5	protein_coding
DEK	ENST00000397239.7	protein_coding
DICER1	ENST00000343455.7	protein_coding
DIS3	ENST00000377767.8	protein_coding
DKC1	ENST00000369550.9	protein_coding
DLEU2	ENST00000621282.4	antisense_RNA
DLEU7	ENST00000400393.3	protein_coding
DNAJB1	ENST00000254322.2	protein_coding
DNAJC21	ENST00000382021.2	protein_coding
DNM2	ENST00000355667.10	protein_coding
DNMT3A	ENST00000321117.9	protein_coding
DOCK8	ENST00000432829.6	protein_coding
DROSHA	ENST00000511367.6	protein_coding
DUSP22	ENST00000344450.9	protein_coding
DUX4	ENST00000616166.1	protein_coding
EBF1	ENST00000313708.10	protein_coding
EGFR	ENST00000275493.6	protein_coding
EIF3E	ENST00000220849.9	protein_coding
EIF4A2	ENST00000323963.9	protein_coding
ELANE	ENST00000263621.1	protein_coding
ELF4	ENST00000308167.9	protein_coding
ELK4	ENST00000357992.8	protein_coding
ELL	ENST00000262809.8	protein_coding
EML4	ENST00000318522.9	protein_coding
EP300	ENST00000263253.8	protein_coding
EPAS1	ENST00000263734.4	protein_coding
EPOR	ENST00000222139.10	protein_coding
EPS15	ENST00000371733.7	protein_coding
ERBB2	ENST00000269571.9	protein_coding
ERBB3	ENST00000267101.7	protein_coding
ERBB4	ENST00000342788.8	protein_coding
ERC1	ENST00000589028.5	protein_coding
ERCC4	ENST00000311895.7	protein_coding
ERCC6L2	ENST00000288985.11	protein_coding
ERG	ENST00000417133.6	protein_coding
ESR1	ENST00000206249.7	protein_coding
ETNK1	ENST00000266517.8	protein_coding
ETV1	ENST00000242066.9	protein_coding
ETV3	ENST00000368192.8	protein_coding
ETV4	ENST00000591713.5	protein_coding
ETV5	ENST00000306376.9	protein_coding
ETV6	ENST00000396373.8	protein_coding
EWSR1	ENST00000414183.6	protein_coding
EZH2	ENST00000320356.6	protein_coding
EZR	ENST00000337147.11	protein_coding
FAM46C	ENST00000369448.3	protein_coding
FANCA	ENST00000389301.7	protein_coding
FANCB	ENST00000398334.5	protein_coding
FANCC	ENST00000289081.7	protein_coding
FANCD2	ENST00000287647.7	protein_coding
FANCE	ENST00000229769.2	protein_coding
FANCF	ENST00000327470.4	protein_coding
FANCG	ENST00000378643.7	protein_coding
FANCI	ENST00000310775.11	protein_coding
FANCL	ENST00000402135.7	protein_coding
FAS	ENST00000355740.6	protein_coding
FAT1	ENST00000441802.6	protein_coding
FAT4	ENST00000394329.7	protein_coding
FBXO11	ENST00000402508.5	protein_coding
FBXW7	ENST00000281708.8	protein_coding
FCGR2B	ENST00000358671.9	protein_coding
FCRL4	ENST00000271532.1	protein_coding
FES	ENST00000328850.7	protein_coding
FEV	ENST00000295727.1	protein_coding
FGFR1	ENST00000447712.6	protein_coding
FGFR1OP	ENST00000366847.8	protein_coding
FGFR2	ENST00000457416.6	protein_coding
FGFR3	ENST00000440486.6	protein_coding
FGFR4	ENST00000292408.8	protein_coding
FHIT	ENST00000492590.5	protein_coding
FIP1L1	ENST00000337488.10	protein_coding
FLI1	ENST00000527786.6	protein_coding
FLT3	ENST00000241453.11	protein_coding
FLT4	ENST00000261937.10	protein_coding
FOXA1	ENST00000250448.2	protein_coding
FOXL2	ENST00000330315.3	protein_coding
FOXO1	ENST00000379561.5	protein_coding
FOXO3	ENST00000406360.1	protein_coding
FOXO4	ENST00000374259.7	protein_coding
FOXP1	ENST00000318789.8	protein_coding
FSTL3	ENST00000166139.8	protein_coding
FUBP1	ENST00000370768.6	protein_coding
FUS	ENST00000254108.11	protein_coding
FYN	ENST00000354650.7	protein_coding
GAS7	ENST00000432992.6	protein_coding
GATA1	ENST00000376670.7	protein_coding
GATA2	ENST00000341105.6	protein_coding
GATA2_enhancer	NA	NA	chr3:128492899-128619969
GATA3	ENST00000379328.7	protein_coding
GBA	ENST00000327247.9	protein_coding
GLIS2	ENST00000433375.1	protein_coding
GNA11	ENST00000078429.8	protein_coding
GNAQ	ENST00000286548.8	protein_coding
GNAS	ENST00000354359.11	protein_coding
GNB1	ENST00000378609.8	protein_coding
GOLGA5	ENST00000163416.6	protein_coding
GOPC	ENST00000368498.6	protein_coding
GPHN	ENST00000478722.5	protein_coding
GRIN2A	ENST00000396573.6	protein_coding
H3F3A	ENST00000366815.7	protein_coding
H3F3B	ENST00000254810.8	protein_coding
HAX1	ENST00000328703.11	protein_coding
HERPUD1	ENST00000439977.6	protein_coding
HEY1	ENST00000337919.9	protein_coding
HIF1A	ENST00000337138.8	protein_coding
HIP1	ENST00000336926.10	protein_coding
HIST1H3B	ENST00000621411.1	protein_coding
HIST1H4I	ENST00000615353.1	protein_coding
HLA-A	ENST00000376806.9	protein_coding
HLF	ENST00000226067.9	protein_coding
HMGA1	ENST00000311487.9	protein_coding
HMGA2	ENST00000403681.6	protein_coding
HNF1A	ENST00000257555.10	protein_coding
HNRNPA2B1	ENST00000354667.8	protein_coding
HNRNPH1	ENST00000442819.6	protein_coding
HOOK3	ENST00000307602.8	protein_coding
HOXA11	ENST00000006015.3	protein_coding
HOXA13	ENST00000222753.5	protein_coding
HOXA9	ENST00000343483.6	protein_coding
HOXC11	ENST00000546378.1	protein_coding
HOXC13	ENST00000243056.4	protein_coding
HOXD11	ENST00000249504.6	protein_coding
HOXD13	ENST00000392539.3	protein_coding
HRAS	ENST00000451590.5	protein_coding
HSP90AA1	ENST00000334701.11	protein_coding
HSP90AB1	ENST00000353801.7	protein_coding
ID3	ENST00000374561.5	protein_coding
IDH1	ENST00000345146.6	protein_coding
IDH2	ENST00000330062.7	protein_coding
IGH	NA	NA	chr14:105586937-106879844
IGK	NA	NA	chr2:88857361-90235368
IGL	NA	NA	chr22:22026076-22922913
IKBKB	ENST00000520810.5	protein_coding
IKZF1	ENST00000331340.7	protein_coding
IL2	ENST00000226730.4	protein_coding
IL21R	ENST00000564089.5	protein_coding
IL3RA	ENST00000331035.9	protein_coding
IL6ST	ENST00000381298.6	protein_coding
IL7R	ENST00000303115.7	protein_coding
IRF4	ENST00000380956.8	protein_coding
IRS4	ENST00000372129.3	protein_coding
ITK	ENST00000422843.7	protein_coding
JAK1	ENST00000342505.4	protein_coding
JAK2	ENST00000381652.3	protein_coding
JAK3	ENST00000458235.5	protein_coding
JUN	ENST00000371222.3	protein_coding
KAT6A	ENST00000396930.3	protein_coding
KAT6B	ENST00000287239.8	protein_coding
KCNJ5	ENST00000529694.5	protein_coding
KDM5A	ENST00000399788.6	protein_coding
KDM5C	ENST00000375401.7	protein_coding
KDM6A	ENST00000377967.8	protein_coding
KDR	ENST00000263923.4	protein_coding
KDSR	ENST00000406396.7	protein_coding
KEAP1	ENST00000393623.6	protein_coding
KIF5B	ENST00000302418.4	protein_coding
KIT	ENST00000288135.5	protein_coding
KLF4	ENST00000374672.4	protein_coding
KLF6	ENST00000497571.5	protein_coding
KLK2	ENST00000358049.8	protein_coding
KMT2A	ENST00000534358.5	protein_coding
KMT2C	ENST00000262189.10	protein_coding
KMT2D	ENST00000301067.11	protein_coding
KNL1	ENST00000346991.9	protein_coding
KRAS	ENST00000256078.8	protein_coding
KTN1	ENST00000395314.7	protein_coding
LASP1	ENST00000318008.10	protein_coding
LATS1	ENST00000543571.5	protein_coding
LATS2	ENST00000382592.4	protein_coding
LCK	ENST00000336890.9	protein_coding
LEF1	ENST00000265165.5	protein_coding
LIFR	ENST00000263409.8	protein_coding
LIG4	ENST00000356922.5	protein_coding
LMNA	ENST00000368300.8	protein_coding
LMO1	ENST00000335790.7	protein_coding
LMO2	ENST00000257818.2	protein_coding
LPP	ENST00000617246.4	protein_coding
LRIG3	ENST00000320743.7	protein_coding
LRP1B	ENST00000389484.7	protein_coding
LYL1	ENST00000264824.4	protein_coding
LZTR1	ENST00000215739.12	protein_coding
MAD2L2	ENST00000376692.8	protein_coding
MAF	ENST00000326043.4	protein_coding
MAFB	ENST00000373313.2	protein_coding
MALT1	ENST00000348428.7	protein_coding
MAML2	ENST00000524717.5	protein_coding
MAP2K1	ENST00000307102.9	protein_coding
MAP2K2	ENST00000262948.9	protein_coding
MAP2K4	ENST00000415385.7	protein_coding
MAP3K1	ENST00000399503.3	protein_coding
MAP3K13	ENST00000265026.7	protein_coding
MAPK1	ENST00000215832.10	protein_coding
MAX	ENST00000358664.8	protein_coding
MBD4	ENST00000249910.5	protein_coding
MDM2	ENST00000258149.9	protein_coding
MDM4	ENST00000367182.7	protein_coding
MECOM	ENST00000494292.5	protein_coding
MECOM_downstream	NA	NA	chr3:168830599-169084761
MED12	ENST00000374080.7	protein_coding
MEF2B	ENST00000424583.6	protein_coding
MEF2D	ENST00000348159.8	protein_coding
MEN1	ENST00000394374.6	protein_coding
MET	ENST00000318493.10	protein_coding
MIGA1	ENST00000443751.3	protein_coding
MITF	ENST00000394351.7	protein_coding
MKL1	ENST00000355630.7	protein_coding
MLF1	ENST00000392822.4	protein_coding
MLH1	ENST00000231790.6	protein_coding
MLLT1	ENST00000252674.8	protein_coding
MLLT10	ENST00000377072.7	protein_coding
MLLT11	ENST00000368921.4	protein_coding
MLLT3	ENST00000380338.8	protein_coding
MLLT6	ENST00000621332.4	protein_coding
MN1	ENST00000302326.4	protein_coding
MNX1	ENST00000252971.10	protein_coding
MPL	ENST00000372470.8	protein_coding
MSH2	ENST00000233146.6	protein_coding
MSH6	ENST00000234420.9	protein_coding
MSI2	ENST00000284073.6	protein_coding
MSN	ENST00000360270.6	protein_coding
MTCP1	ENST00000369476.7	protein_coding
MTOR	ENST00000361445.8	protein_coding
MUC1	ENST00000337604.6	protein_coding
MYB	ENST00000341911.9	protein_coding
MYC	ENST00000613283.2	protein_coding
MYCL	ENST00000397332.2	protein_coding
MYCN	ENST00000281043.3	protein_coding
MYD88	ENST00000396334.7	protein_coding
MYH11	ENST00000452625.6	protein_coding
MYH9	ENST00000216181.9	protein_coding
MYO5A	ENST00000399231.7	protein_coding
MYOD1	ENST00000250003.3	protein_coding
NAB2	ENST00000300131.7	protein_coding
NAF1	ENST00000274054.2	protein_coding
NBN	ENST00000265433.7	protein_coding
NCOA1	ENST00000348332.7	protein_coding
NCOA2	ENST00000452400.6	protein_coding
NCOA4	ENST00000578454.5	protein_coding
NCOR1	ENST00000268712.7	protein_coding
NCOR2	ENST00000405201.5	protein_coding
NDRG1	ENST00000323851.11	protein_coding
NF1	ENST00000358273.8	protein_coding
NF2	ENST00000338641.8	protein_coding
NFATC2	ENST00000396009.7	protein_coding
NFE2	ENST00000435572.6	protein_coding
NFE2L2	ENST00000397062.7	protein_coding
NFIB	ENST00000380953.5	protein_coding
NFKB2	ENST00000369966.7	protein_coding
NFKBIE	ENST00000275015.9	protein_coding
NHP2	ENST00000274606.7	protein_coding
NIN	ENST00000245441.9	protein_coding
NKX2-1	ENST00000354822.6	protein_coding
NONO	ENST00000276079.12	protein_coding
NOP10	ENST00000328848.5	protein_coding
NOTCH1	ENST00000277541.6	protein_coding
NOTCH2	ENST00000256646.6	protein_coding
NPM1	ENST00000296930.9	protein_coding
NR4A3	ENST00000618101.4	protein_coding
NRAS	ENST00000369535.4	protein_coding
NRG1	ENST00000520407.5	protein_coding
NSD1	ENST00000439151.6	protein_coding
NSD2	ENST00000508803.5	protein_coding
NSD3	ENST00000317025.12	protein_coding
NT5C2	ENST00000343289.9	protein_coding
NTRK1	ENST00000524377.5	protein_coding
NTRK3	ENST00000360948.6	protein_coding
NUDT15	ENST00000258662.2	protein_coding
NUMA1	ENST00000393695.7	protein_coding
NUP214	ENST00000359428.9	protein_coding
NUP98	ENST00000324932.11	protein_coding
NUTM1	ENST00000614490.4	protein_coding
NUTM2A	ENST00000381707.6	protein_coding
NUTM2B	ENST00000429828.5	protein_coding
OLIG2	ENST00000382357.3	protein_coding
P2RY8	ENST00000381297.9	protein_coding
PACSIN2	ENST00000403744.7	protein_coding
PAFAH1B2	ENST00000527958.5	protein_coding
PALB2	ENST00000261584.8	protein_coding
PARN	ENST00000437198.6	protein_coding
PATZ1	ENST00000266269.9	protein_coding
PAX3	ENST00000350526.8	protein_coding
PAX5	ENST00000358127.8	protein_coding
PAX7	ENST00000420770.6	protein_coding
PAX8	ENST00000263335.11	protein_coding
PBRM1	ENST00000394830.7	protein_coding
PBX1	ENST00000420696.6	protein_coding
PCM1	ENST00000325083.12	protein_coding
PDCD1LG2	ENST00000397747.4	protein_coding
PDE4DIP	ENST00000369354.7	protein_coding
PDGFB	ENST00000331163.10	protein_coding
PDGFRA	ENST00000257290.9	protein_coding
PDGFRB	ENST00000261799.8	protein_coding
PER1	ENST00000317276.8	protein_coding
PHF6	ENST00000332070.7	protein_coding
PHOX2B	ENST00000226382.3	protein_coding
PICALM	ENST00000528398.5	protein_coding
PIK3CA	ENST00000263967.3	protein_coding
PIK3CB	ENST00000289153.6	protein_coding
PIK3CD	ENST00000377346.8	protein_coding
PIK3R1	ENST00000521381.5	protein_coding
PIM1	ENST00000373509.5	protein_coding
PLAG1	ENST00000316981.7	protein_coding
PLCG1	ENST00000244007.7	protein_coding
PLCG2	ENST00000564138.5	protein_coding
PML	ENST00000268058.7	protein_coding
PMS2	ENST00000265849.11	protein_coding
POLD1	ENST00000440232.6	protein_coding
POLE	ENST00000320574.9	protein_coding
POLQ	ENST00000264233.5	protein_coding
POT1	ENST00000357628.7	protein_coding
POU2AF1	ENST00000393067.7	protein_coding
POU5F1	ENST00000259915.12	protein_coding
PPARG	ENST00000309576.10	protein_coding
PPFIBP1	ENST00000318304.12	protein_coding
PPM1D	ENST00000305921.7	protein_coding
PPP2R1A	ENST00000322088.10	protein_coding
PPP6C	ENST00000451402.5	protein_coding
PRCC	ENST00000271526.8	protein_coding
PRDM1	ENST00000369096.8	protein_coding
PRDM16	ENST00000270722.9	protein_coding
PREX2	ENST00000288368.4	protein_coding
PRF1	ENST00000441259.1	protein_coding
PRKACA	ENST00000308677.8	protein_coding
PRKAR1A	ENST00000392711.5	protein_coding
PRPF8	ENST00000304992.10	protein_coding
PRRX1	ENST00000367760.7	protein_coding
PSIP1	ENST00000380738.8	protein_coding
PTCH1	ENST00000331920.10	protein_coding
PTEN	ENST00000371953.7	protein_coding
PTK6	ENST00000542869.2	protein_coding
PTPN11	ENST00000351677.6	protein_coding
PTPN13	ENST00000436978.5	protein_coding
PTPRB	ENST00000334414.10	protein_coding
PTPRC	ENST00000442510.6	protein_coding
PTPRK	ENST00000368213.9	protein_coding
PTPRT	ENST00000373198.8	protein_coding
QKI	ENST00000361752.7	protein_coding
RABEP1	ENST00000537505.5	protein_coding
RAC1	ENST00000356142.4	protein_coding
RAD21	ENST00000297338.6	protein_coding
RAD51B	ENST00000487270.5	protein_coding
RAF1	ENST00000251849.8	protein_coding
RANBP2	ENST00000283195.10	protein_coding
RAP1GDS1	ENST00000339360.9	protein_coding
RARA	ENST00000254066.9	protein_coding
RB1	ENST00000267163.4	protein_coding
RBM10	ENST00000377604.7	protein_coding
RBM15	ENST00000618772.4	protein_coding
REL	ENST00000295025.12	protein_coding
RET	ENST00000355710.7	protein_coding
RHOA	ENST00000418115.5	protein_coding
RHOH	ENST00000614836.1	protein_coding
RMI2	ENST00000312499.5	protein_coding
RMRP	ENST00000602361.1	lincRNA
RNF11	ENST00000242719.3	protein_coding
RNF213	ENST00000582970.5	protein_coding
RNF43	ENST00000577716.5	protein_coding
ROS1	ENST00000368508.7	protein_coding
RPL10	ENST00000406022.6	protein_coding
RPL11	ENST00000374550.7	protein_coding
RPL15	ENST00000456530.6	protein_coding
RPL22	ENST00000234875.8	protein_coding
RPL23	ENST00000479035.6	protein_coding
RPL26	ENST00000293842.9	protein_coding
RPL31	ENST00000409028.8	protein_coding
RPL35A	ENST00000448864.5	protein_coding
RPL36	ENST00000347512.7	protein_coding
RPL5	ENST00000370321.7	protein_coding
RPN1	ENST00000296255.7	protein_coding
RPS10	ENST00000326199.12	protein_coding
RPS17	ENST00000330244.10	protein_coding
RPS19	ENST00000598742.5	protein_coding
RPS24	ENST00000435275.5	protein_coding
RPS26	ENST00000552361.1	protein_coding
RPS27	ENST00000368567.4	protein_coding
RPS27A	ENST00000402285.7	protein_coding
RPS28	ENST00000600659.2	protein_coding
RPS29	ENST00000396020.7	protein_coding
RPS7	ENST00000304921.9	protein_coding
RSPO2	ENST00000276659.9	protein_coding
RSPO3	ENST00000356698.8	protein_coding
RTEL1	ENST00000508582.6	protein_coding
RUNX1	ENST00000437180.5	protein_coding
RUNX1T1	ENST00000360348.6	protein_coding
SALL4	ENST00000217086.8	protein_coding
SAMD9L	ENST00000318238.8	protein_coding
SBDS	ENST00000246868.6	protein_coding
SDC4	ENST00000372733.3	protein_coding
SDHA	ENST00000264932.10	protein_coding
SET	ENST00000372692.8	protein_coding
SETBP1	ENST00000282030.5	protein_coding
SETD2	ENST00000409792.3	protein_coding
SF3B1	ENST00000335508.10	protein_coding
SFPQ	ENST00000357214.5	protein_coding
SFRP4	ENST00000436072.6	protein_coding
SH2B3	ENST00000341259.6	protein_coding
SH2D1A	ENST00000371139.8	protein_coding
SH3GL1	ENST00000269886.7	protein_coding
SIX1	ENST00000247182.6	protein_coding
SLC34A2	ENST00000382051.7	protein_coding
SLC45A3	ENST00000367145.3	protein_coding
SLX4	ENST00000294008.3	protein_coding
SMAD2	ENST00000356825.8	protein_coding
SMAD3	ENST00000327367.8	protein_coding
SMAD4	ENST00000342988.7	protein_coding
SMARCA4	ENST00000450717.7	protein_coding
SMARCB1	ENST00000263121.11	protein_coding
SMARCD1	ENST00000394963.8	protein_coding
SMO	ENST00000249373.7	protein_coding
SND1	ENST00000354725.7	protein_coding
SOCS1	ENST00000332029.2	protein_coding
SOX2	ENST00000325404.2	protein_coding
SPEN	ENST00000375759.7	protein_coding
SPOP	ENST00000393328.6	protein_coding
SRC	ENST00000373578.6	protein_coding
SRSF2	ENST00000392485.2	protein_coding
SRSF3	ENST00000373715.10	protein_coding
SS18	ENST00000415083.6	protein_coding
SS18L1	ENST00000331758.7	protein_coding
SSX1	ENST00000376919.3	protein_coding
SSX2	ENST00000336777.9	protein_coding
SSX4	ENST00000595689.2	protein_coding
STAG2	ENST00000218089.13	protein_coding
STAT3	ENST00000264657.9	protein_coding
STAT5B	ENST00000293328.7	protein_coding
STAT6	ENST00000300134.7	protein_coding
STIL	ENST00000371877.7	protein_coding
STK11	ENST00000326873.11	protein_coding
STN1	ENST00000224950.7	protein_coding
STRN	ENST00000263918.8	protein_coding
SUFU	ENST00000369902.7	protein_coding
SUZ12	ENST00000322652.9	protein_coding
SYK	ENST00000375754.8	protein_coding
TAF15	ENST00000605844.5	protein_coding
TAL1	ENST00000294339.3	protein_coding
TAL2	ENST00000334077.5	protein_coding
TBL1XR1	ENST00000457928.6	protein_coding
TBX3	ENST00000257566.7	protein_coding
TCEA1	ENST00000521604.6	protein_coding
TCF12	ENST00000438423.6	protein_coding
TCF3	ENST00000262965.9	protein_coding
TCF7L2	ENST00000369397.8	protein_coding
TCL1A	ENST00000402399.5	protein_coding
TERC	ENST00000602385.1	lincRNA
TERT	ENST00000310581.9	protein_coding
TET1	ENST00000373644.4	protein_coding
TET2	ENST00000380013.8	protein_coding
TFE3	ENST00000315869.7	protein_coding
TFEB	ENST00000358871.6	protein_coding
TFG	ENST00000490574.5	protein_coding
TGFBR2	ENST00000359013.4	protein_coding
TINF2	ENST00000267415.11	protein_coding
TLX1	ENST00000370196.10	protein_coding
TLX3	ENST00000296921.5	protein_coding
TMPRSS2	ENST00000398585.7	protein_coding
TNFAIP3	ENST00000612899.4	protein_coding
TNFRSF14	ENST00000355716.4	protein_coding
TNFRSF17	ENST00000053243.5	protein_coding
TOP1	ENST00000361337.2	protein_coding
TP53	ENST00000269305.8	protein_coding
TP63	ENST00000264731.7	protein_coding
TPM3	ENST00000368530.6	protein_coding
TPM4	ENST00000344824.10	protein_coding
TPMT	ENST00000309983.4	protein_coding
TPR	ENST00000367478.8	protein_coding
TRA	NA	NA	chr14:21621904-22552132
TRAF7	ENST00000326181.10	protein_coding
TRB	NA	NA	chr7:142299011-142813287
TRD	NA	NA	chr14:21924138-22469614
TRG	NA	NA	chr7:38240024-38368055
TRIM24	ENST00000343526.8	protein_coding
TRIM27	ENST00000377199.3	protein_coding
TRIM33	ENST00000358465.6	protein_coding
TRIP11	ENST00000267622.8	protein_coding
TRRAP	ENST00000359863.8	protein_coding
TSC1	ENST00000298552.7	protein_coding
TSC2	ENST00000219476.7	protein_coding
TSHR	ENST00000298171.6	protein_coding
U2AF1	ENST00000291552.8	protein_coding
UBA1	ENST00000377351.8	protein_coding
UBE2T	ENST00000367274.8	protein_coding
UBR5	ENST00000520539.5	protein_coding
USP6	ENST00000250066.6	protein_coding
USP8	ENST00000307179.8	protein_coding
VAV1	ENST00000602142.5	protein_coding
VHL	ENST00000256474.2	protein_coding
WAS	ENST00000376701.4	protein_coding
WDCP	ENST00000295148.8	protein_coding
WIF1	ENST00000286574.8	protein_coding
WRAP53	ENST00000396463.6	protein_coding
WT1	ENST00000332351.7	protein_coding
WWTR1	ENST00000360632.7	protein_coding
XPO1	ENST00000401558.6	protein_coding
XRCC2	ENST00000359321.1	protein_coding
YWHAE	ENST00000264335.12	protein_coding
ZBTB16	ENST00000335953.8	protein_coding
ZFHX3	ENST00000268489.9	protein_coding
ZMYM2	ENST00000382874.6	protein_coding
ZNF217	ENST00000302342.3	protein_coding
ZNF331	ENST00000411977.6	protein_coding
ZNF384	ENST00000396801.7	protein_coding
ZNF521	ENST00000361524.7	protein_coding
ZRSR2	ENST00000307771.7	protein_coding
BCOR_downstream	NA	NA	chrX:40030374-40051251
ABL1	ENST00000318560.5	protein_coding
DUX4L26	ENST00000489078.1	processed_pseudogene
DUX4L9	ENST00000449051.3	unprocessed_pseudogene
DUX4L8	ENST00000629013.1	unprocessed_pseudogene
DUX4L7	ENST00000630678.1	unprocessed_pseudogene
DUX4L6	ENST00000626483.1	unprocessed_pseudogene
DUX4L5	ENST00000630834.1	unprocessed_pseudogene
DUX4L4	ENST00000566884.2	unprocessed_pseudogene
DUX4L1	ENST00000627662.1	unprocessed_pseudogene
DUX4L3	ENST00000630187.1	unprocessed_pseudogene
DUX4L2	ENST00000561772.3	unprocessed_pseudogene
DUX4L51	ENST00000508172.3	processed_pseudogene
DUX4L50	ENST00000455245.1	unprocessed_pseudogene
DUX4L28	ENST00000623687.1	unprocessed_pseudogene
DUX4L25	ENST00000624915.1	unprocessed_pseudogene
DUX4L24	ENST00000617576.2	unprocessed_pseudogene
DUX4L23	ENST00000615195.1	unprocessed_pseudogene
DUX4L22	ENST00000618238.1	unprocessed_pseudogene
DUX4L21	ENST00000622058.1	unprocessed_pseudogene
DUX4L20	ENST00000619712.1	unprocessed_pseudogene
DUX4L29	ENST00000425409.2	unprocessed_pseudogene
DUX4L10	ENST00000622460.1	unprocessed_pseudogene
DUX4L11	ENST00000611504.1	unprocessed_pseudogene
DUX4L12	ENST00000614593.1	unprocessed_pseudogene
DUX4L13	ENST00000554103.2	unprocessed_pseudogene
DUX4L14	ENST00000621227.1	unprocessed_pseudogene
DUX4L15	ENST00000611059.1	unprocessed_pseudogene
DUX4L27	ENST00000554796.3	processed_pseudogene
DUX4L52	ENST00000549363.2	processed_pseudogene
DUX4L45	ENST00000566406.1	processed_pseudogene
DUX4L46	ENST00000566845.1	processed_pseudogene
DUX4L47	ENST00000566374.1	processed_pseudogene
DUX4L32	ENST00000635219.1	unprocessed_pseudogene
DUX4L33	ENST00000635217.1	unprocessed_pseudogene
DUX4L34	ENST00000634362.1	unprocessed_pseudogene
DUX4L35	ENST00000635630.1	unprocessed_pseudogene
DUX4L37	ENST00000635145.1	unprocessed_pseudogene
DUX4L31	ENST00000446466.1	unprocessed_pseudogene
DUX4L16	ENST00000555130.1	unprocessed_pseudogene
DUX4L17	ENST00000557360.1	unprocessed_pseudogene
DUX4L18	ENST00000553347.1	unprocessed_pseudogene
DUX4L19	ENST00000557448.1	unprocessed_pseudogene

## Sheet: Supp Table 6B
GENE_NAME	VARIANT_TYPE	REGION	dbSNP_ID
ABL1	small
ACVR1	small
AKT1	small
ALK	small
AMER1	small
APC	small
ARID1A	small
ARID1B	small
ASXL1	small
ATM	small
ATR	small
ATRX	small
BARD1	small
BBC3	small
BCOR	small
BRAF	small
BRCA1	small
BRCA2	small
BRIP1	small
CCND1	small
CCND2	small
CCNE1	small
CDK12	small
CDK4	small
CDK6	small
CDKN1A	small
CDKN2A	small
CDKN2B	small
CHEK1	small
CHEK2	small
CIC	small
CREBBP	small
CTNNB1	small
DAXX	small
DDX3X	small
DICER1	small
DPYD	small
DROSHA	small
EGFR	small
EMSY	small
EPHB2	small
ERBB2	small
EZH2	small
FANCI	small
FANCL	small
FBXW7	small
FGFR1	small
FGFR2	small
FGFR3	small
FGFR4	small
GPR161	small
H3F3A	small
H3F3B	small
HIST1H3B	small
HIST1H3C	small
HIST2H3C	small
HRAS	small
IDH1	small
IDH2	small
IGF1R	small
KIAA1549	small
KIT	small
KMT2A	small
KRAS	small
LIN28B	small
MAP2K1	small
MAP2K2	small
MAPK1	small
MDM2	small
MDM4	small
MET	small
MLH1	small
MRE11	small
MSH2	small
MSH6	small
MYC	small
MYCL	small
MYCN	small
MYOD1	small
NF1	small
NF2	small
NRAS	small
PALB2	small
PDGFRA	small
PHOX2B	small
PIK3CA	small
PIK3R1	small
PIN1	small
PMS1	small
PMS2	small
PPM1D	small
PPP2R2A	small
PRKAR1A	small
PTCH1	small
PTCH2	small
PTEN	small
PTPN11	small
RAD51B	small
RAD51C	small
RAD51D	small
RAD54L	small
RAF1	small
RB1	small
RET	small
SETD2	small
SMARCA4	small
SMARCB1	small
SMARCE1	small
SMO	small
SUFU	small
TERT	small
TFE3	small
TP53	small
TSC1	small
TSC2	small
VHL	small
WT1	small
YAP1	small
YWHAE	small
ABL1	CNA/disruptive SV
ACVR1	CNA/disruptive SV
AKT1	CNA/disruptive SV
ALK	CNA/disruptive SV
AMER1	CNA/disruptive SV
APC	CNA/disruptive SV
ARID1A	CNA/disruptive SV
ARID1B	CNA/disruptive SV
ASXL1	CNA/disruptive SV
ATM	CNA/disruptive SV
ATR	CNA/disruptive SV
ATRX	CNA/disruptive SV
BARD1	CNA/disruptive SV
BBC3	CNA/disruptive SV
BCOR	CNA/disruptive SV
BRAF	CNA/disruptive SV
BRCA1	CNA/disruptive SV
BRCA2	CNA/disruptive SV
BRIP1	CNA/disruptive SV
CCND1	CNA/disruptive SV
CCND2	CNA/disruptive SV
CCNE1	CNA/disruptive SV
CDK12	CNA/disruptive SV
CDK4	CNA/disruptive SV
CDK6	CNA/disruptive SV
CDKN1A	CNA/disruptive SV
CDKN2A	CNA/disruptive SV
CDKN2B	CNA/disruptive SV
CHEK1	CNA/disruptive SV
CHEK2	CNA/disruptive SV
CIC	CNA/disruptive SV
CREBBP	CNA/disruptive SV
CTNNB1	CNA/disruptive SV
DAXX	CNA/disruptive SV
DDX3X	CNA/disruptive SV
DICER1	CNA/disruptive SV
DROSHA	CNA/disruptive SV
EGFR	CNA/disruptive SV
EMSY	CNA/disruptive SV
EPHB2	CNA/disruptive SV
ERBB2	CNA/disruptive SV
EZH2	CNA/disruptive SV
FANCI	CNA/disruptive SV
FANCL	CNA/disruptive SV
FBXW7	CNA/disruptive SV
FGFR1	CNA/disruptive SV
FGFR2	CNA/disruptive SV
FGFR3	CNA/disruptive SV
FGFR4	CNA/disruptive SV
GPR161	CNA/disruptive SV
H3F3A	CNA/disruptive SV
HIST1H3B	CNA/disruptive SV
HIST1H3C	CNA/disruptive SV
HIST2H3C	CNA/disruptive SV
HRAS	CNA/disruptive SV
IDH1	CNA/disruptive SV
IDH2	CNA/disruptive SV
IGF1R	CNA/disruptive SV
KIAA1549	CNA/disruptive SV
KIT	CNA/disruptive SV
KMT2A	CNA/disruptive SV
KRAS	CNA/disruptive SV
LIN28B	CNA/disruptive SV
MAP2K1	CNA/disruptive SV
MAP2K2	CNA/disruptive SV
MAPK1	CNA/disruptive SV
MDM2	CNA/disruptive SV
MDM4	CNA/disruptive SV
MET	CNA/disruptive SV
MLH1	CNA/disruptive SV
MN1	CNA/disruptive SV
MRE11	CNA/disruptive SV
MSH2	CNA/disruptive SV
MSH6	CNA/disruptive SV
MYC	CNA/disruptive SV
MYCL	CNA/disruptive SV
MYCN	CNA/disruptive SV
MYOD1	CNA/disruptive SV
NF1	CNA/disruptive SV
NF2	CNA/disruptive SV
NRAS	CNA/disruptive SV
NTRK1	CNA/disruptive SV
NTRK2	CNA/disruptive SV
NTRK3	CNA/disruptive SV
PALB2	CNA/disruptive SV
PDGFRA	CNA/disruptive SV
PHOX2B	CNA/disruptive SV
PIK3CA	CNA/disruptive SV
PIK3R1	CNA/disruptive SV
PIN1	CNA/disruptive SV
PMS1	CNA/disruptive SV
PMS2	CNA/disruptive SV
PPM1D	CNA/disruptive SV
PPP2R2A	CNA/disruptive SV
PRKAR1A	CNA/disruptive SV
PTCH1	CNA/disruptive SV
PTCH2	CNA/disruptive SV
PTEN	CNA/disruptive SV
PTPN11	CNA/disruptive SV
RAD51B	CNA/disruptive SV
RAD51C	CNA/disruptive SV
RAD51D	CNA/disruptive SV
RAD54L	CNA/disruptive SV
RAF1	CNA/disruptive SV
RB1	CNA/disruptive SV
RET	CNA/disruptive SV
SETD2	CNA/disruptive SV
SMARCA4	CNA/disruptive SV
SMARCB1	CNA/disruptive SV
SMARCE1	CNA/disruptive SV
SMO	CNA/disruptive SV
SUFU	CNA/disruptive SV
TERT	CNA/disruptive SV
TFE3	CNA/disruptive SV
TP53	CNA/disruptive SV
TSC1	CNA/disruptive SV
TSC2	CNA/disruptive SV
VHL	CNA/disruptive SV
WT1	CNA/disruptive SV
YAP1	CNA/disruptive SV
YWHAE	CNA/disruptive SV
AGK	fusion
AKAP9	fusion
ASPSCR1	fusion
BRAF	fusion
BRD2	fusion
BRD3	fusion
BRD4	fusion
C11orf95	fusion
CCDC6	fusion
CIC	fusion
DNAJB1	fusion
ETV6	fusion
FAM118B	fusion
FXR1	fusion
GNAI1	fusion
KIAA1549	fusion
MACF1	fusion
MALAT1	fusion
MITF	fusion
MYC	fusion
NFIA	fusion
NTRK3	fusion
NUTM1	fusion
NUTM2B	fusion
NUTM2E	fusion
PRCC	fusion
PRKACA	fusion
PVT1	fusion
RAF1	fusion
SRGAP3	fusion
TFE3	fusion
TFEB	fusion
YAP1	fusion
YWHAE	fusion
C19MC	CNA/disruptive SV	chr19:53666679-53762430
TERT_promoter	small	chr5:1293439-1296223	rs1242535815; rs1561215364

## Sheet: Supp Table 6C
GENE_NAME	VARIANT_TYPE
ACD	all
AKT1	all
ALK	all
APC	all
ATM	all
BLM	all
BMPR1A	all
BRAF	all
BRCA1	all
BRCA2	all
BRIP1	all
BUB1B	all
CBL	all
CDC73	all
CDKN1C	all
CTC1	all
CTR9	all
DDB2	all
DICER1	all
DIS3L2	all
DKC1	all
ELP1	all
ERCC1	all
ERCC2	all
ERCC3	all
ERCC4	all
ERCC5	all
EZH2	all
FANCA	all
FANCB	all
FANCC	all
FANCD2	all
FANCE	all
FANCF	all
FANCG	all
FANCI	all
FANCL	all
FANCM	all
GPC3	all
GPR161	all
H19	all
HRAS	all
IGF2	all
KCNQ1OT1	all
KLLN	all
KRAS	all
LZTR1	all
MAP2K1	all
MAP2K2	all
MAX	all
MEN1	all
MLH1	all
MSH2	all
MSH6	all
MTAP	all
NBN	all
NF1	all
NF2	all
NFIX	all
NHP2	all
NOP10	all
NOTCH3	all
NRAS	all
NSD1	all
NYNRIN	all
PALB2	all
PARN	all
PAX5	all
PAX6	all
PDGFRA	all
PDGFRB	all
PHOX2B	all
PIK3CA	all
PMS2	all
POLH	all
PPP1CB	all
PRKAR1A	all
PTCH1	all
PTEN	all
PTPN11	all
RAD51C	all
RAF1	all
RB1	all
RECQL4	all
REST	all
RET	all
RIT1	all
RTEL1	all
SDHB	all
SDHD	all
SHOC2	all
SLX4	all
SMAD4	all
SMARCA4	all
SMARCB1	all
SOS1	all
SOS2	all
SPRED1	all
SQSTM1	all
STK11	all
SUFU	all
TBXT	all
TERC	all
TERT	all
TINF2	all
TNFRSF11A	all
TP53	all
TRIM28	all
TRIM37	all
TRIP13	all
TSC1	all
TSC2	all
VHL	all
WRAP53	all
WRN	all
WT1	all
XPA	all
XPC	all
